# Supplementary material
Source: PubMed Central journal article supplement (PMC7212034)

$B_1^+$  (flip angle) map

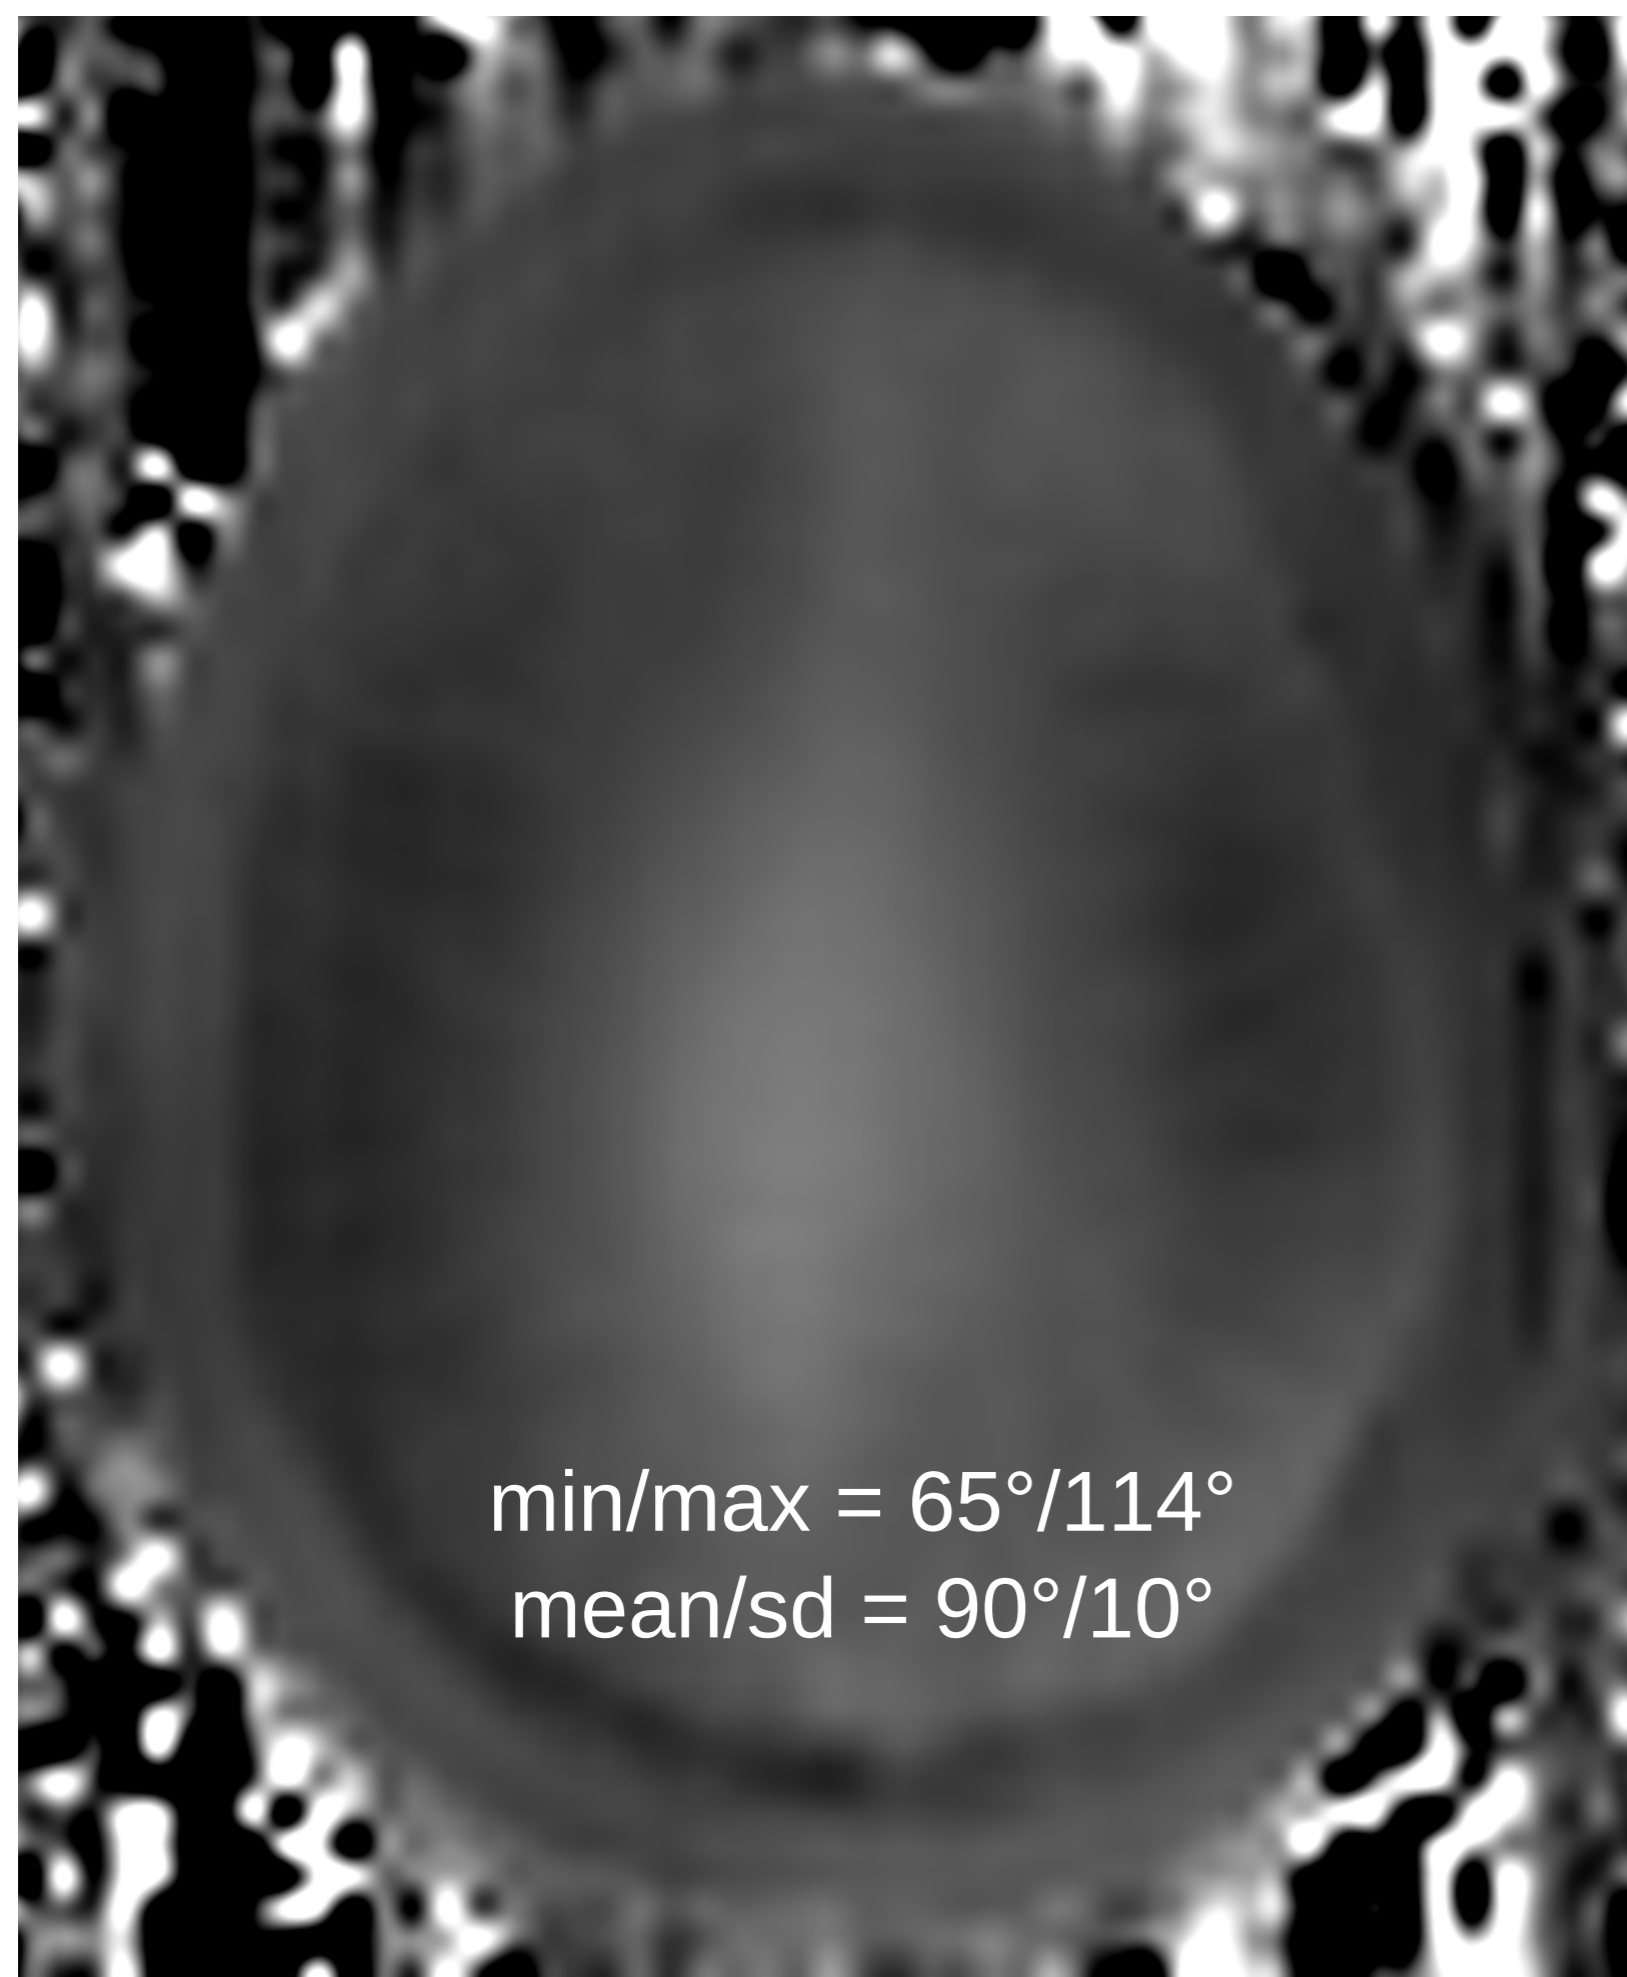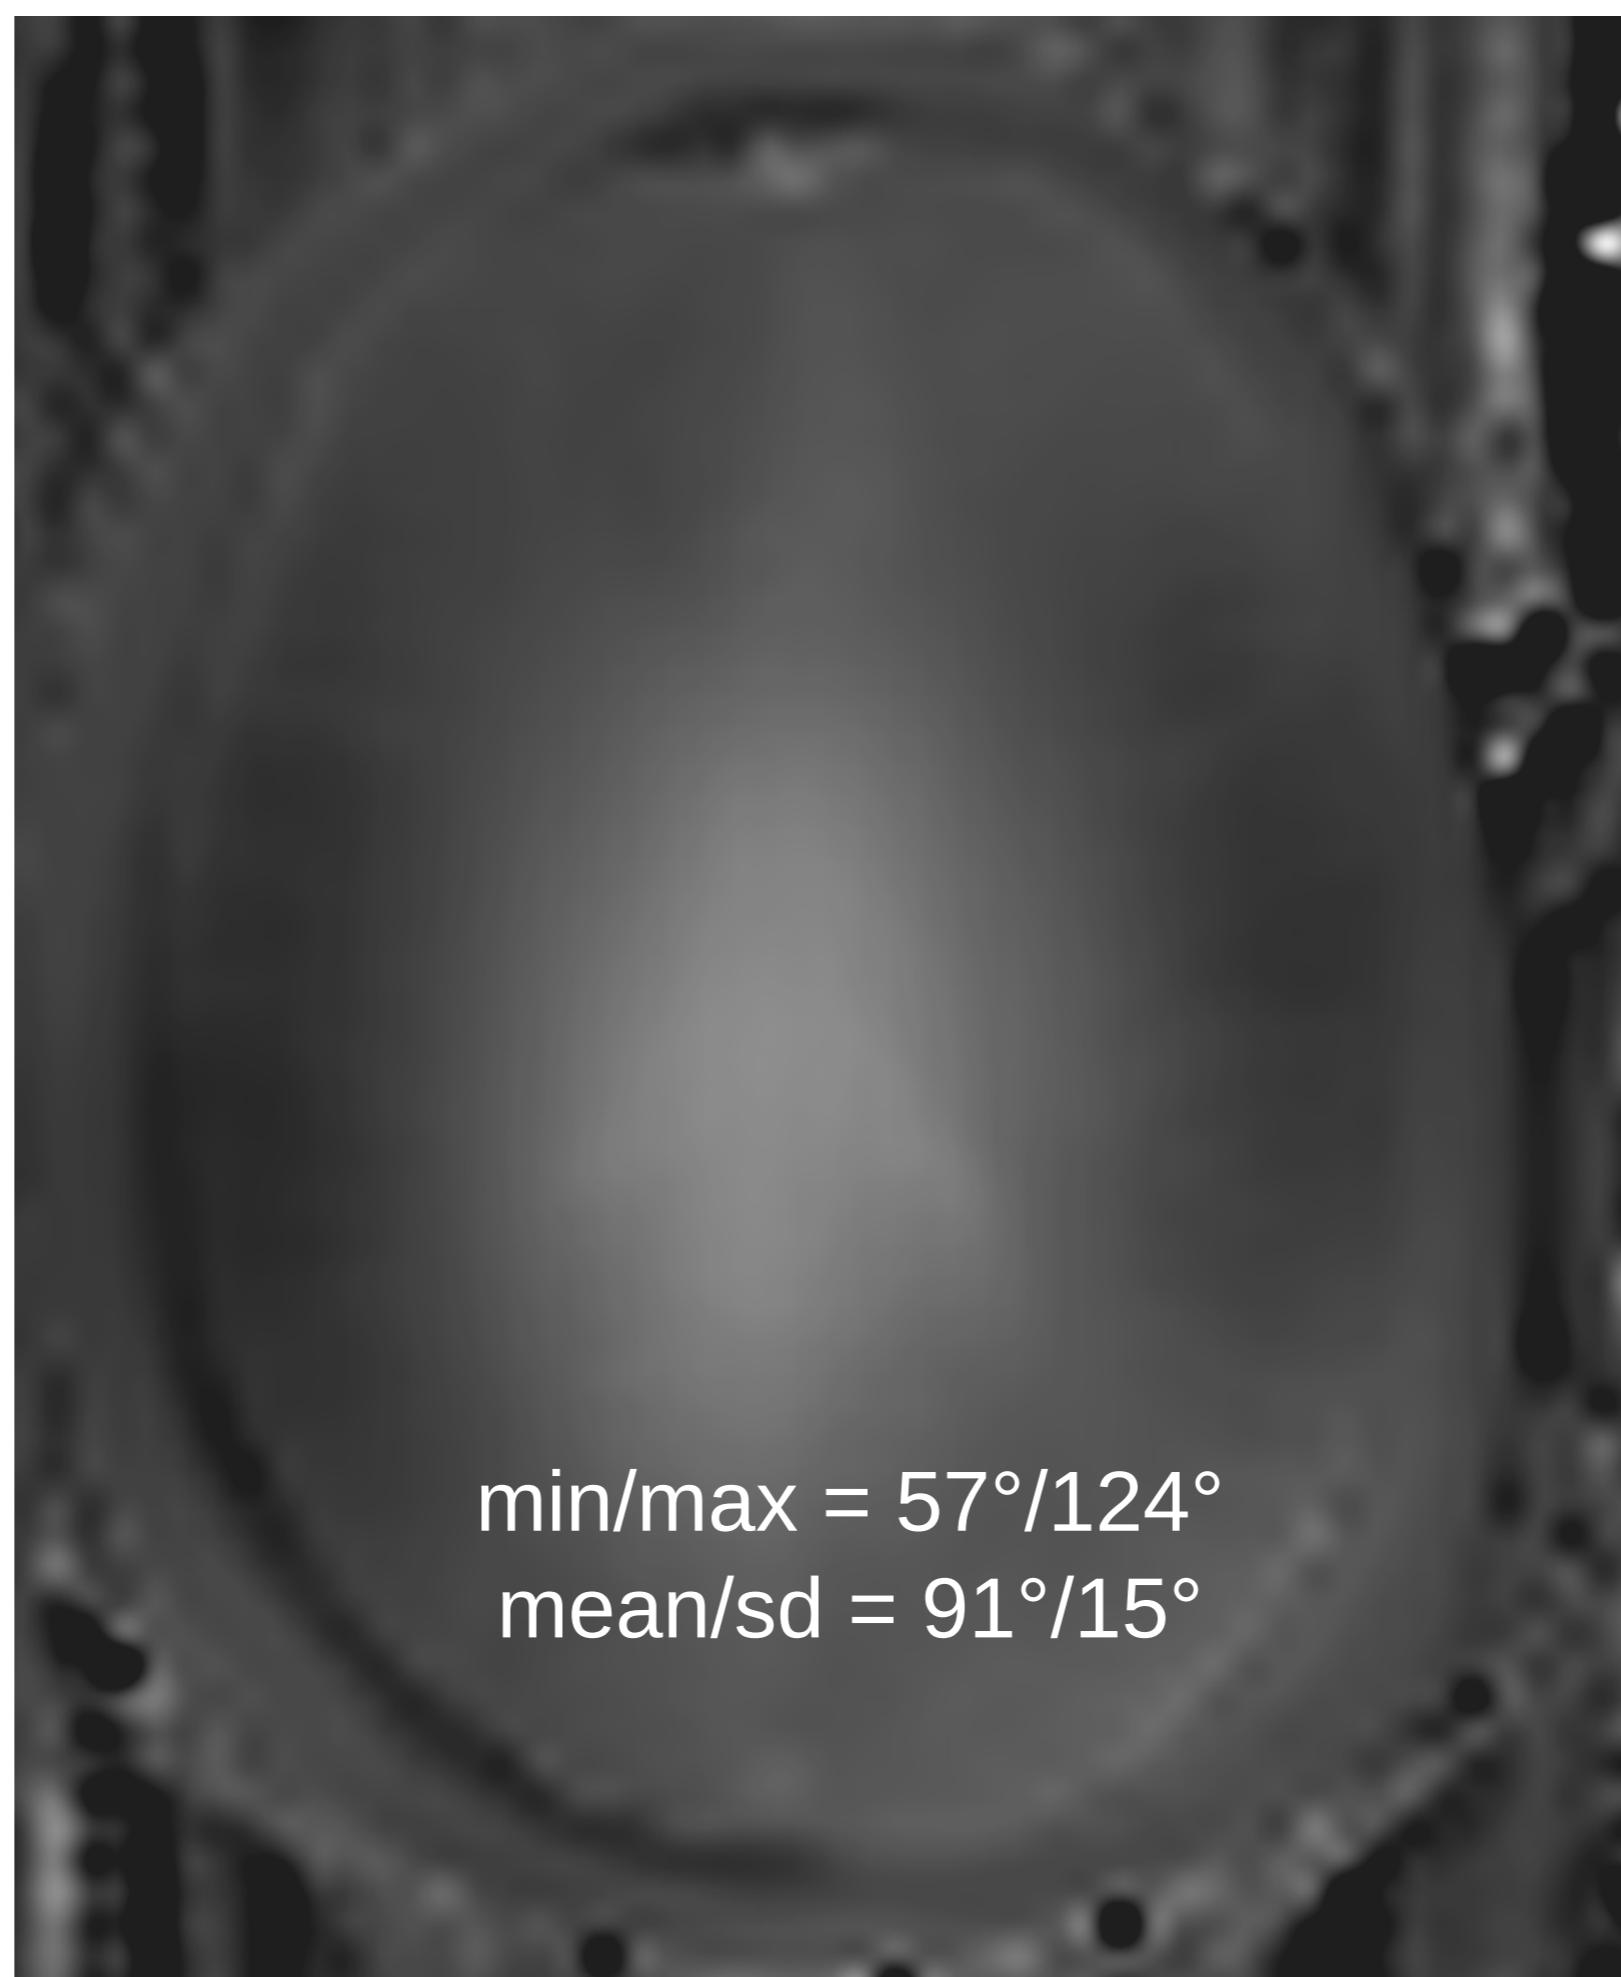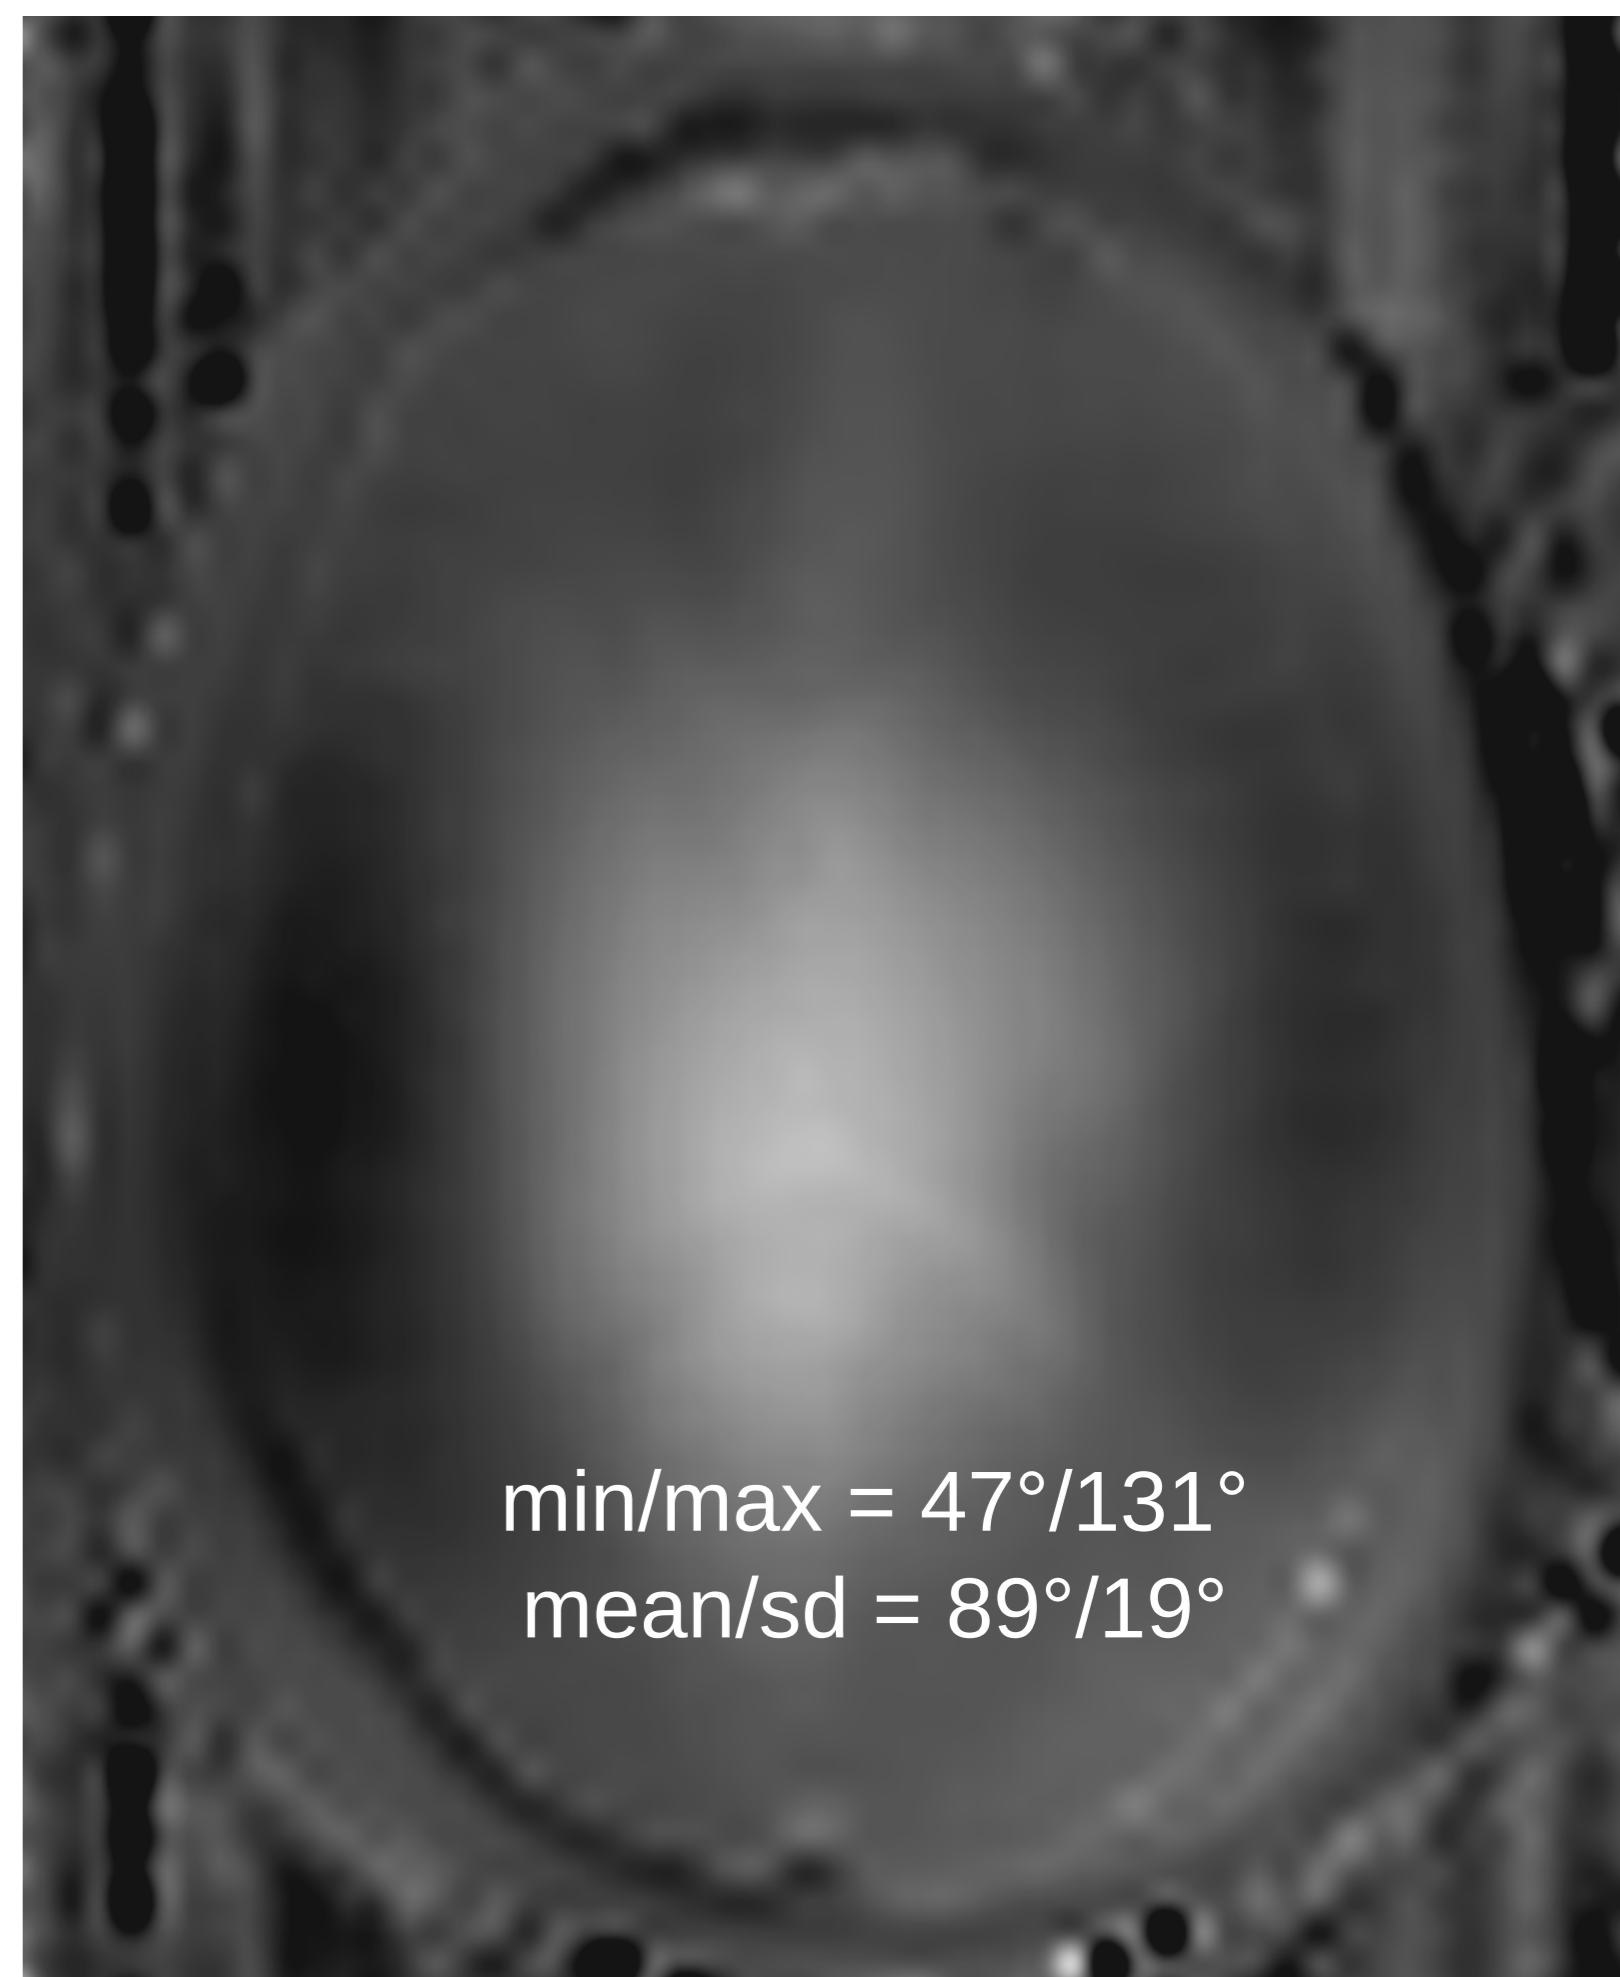

$B_0$  map

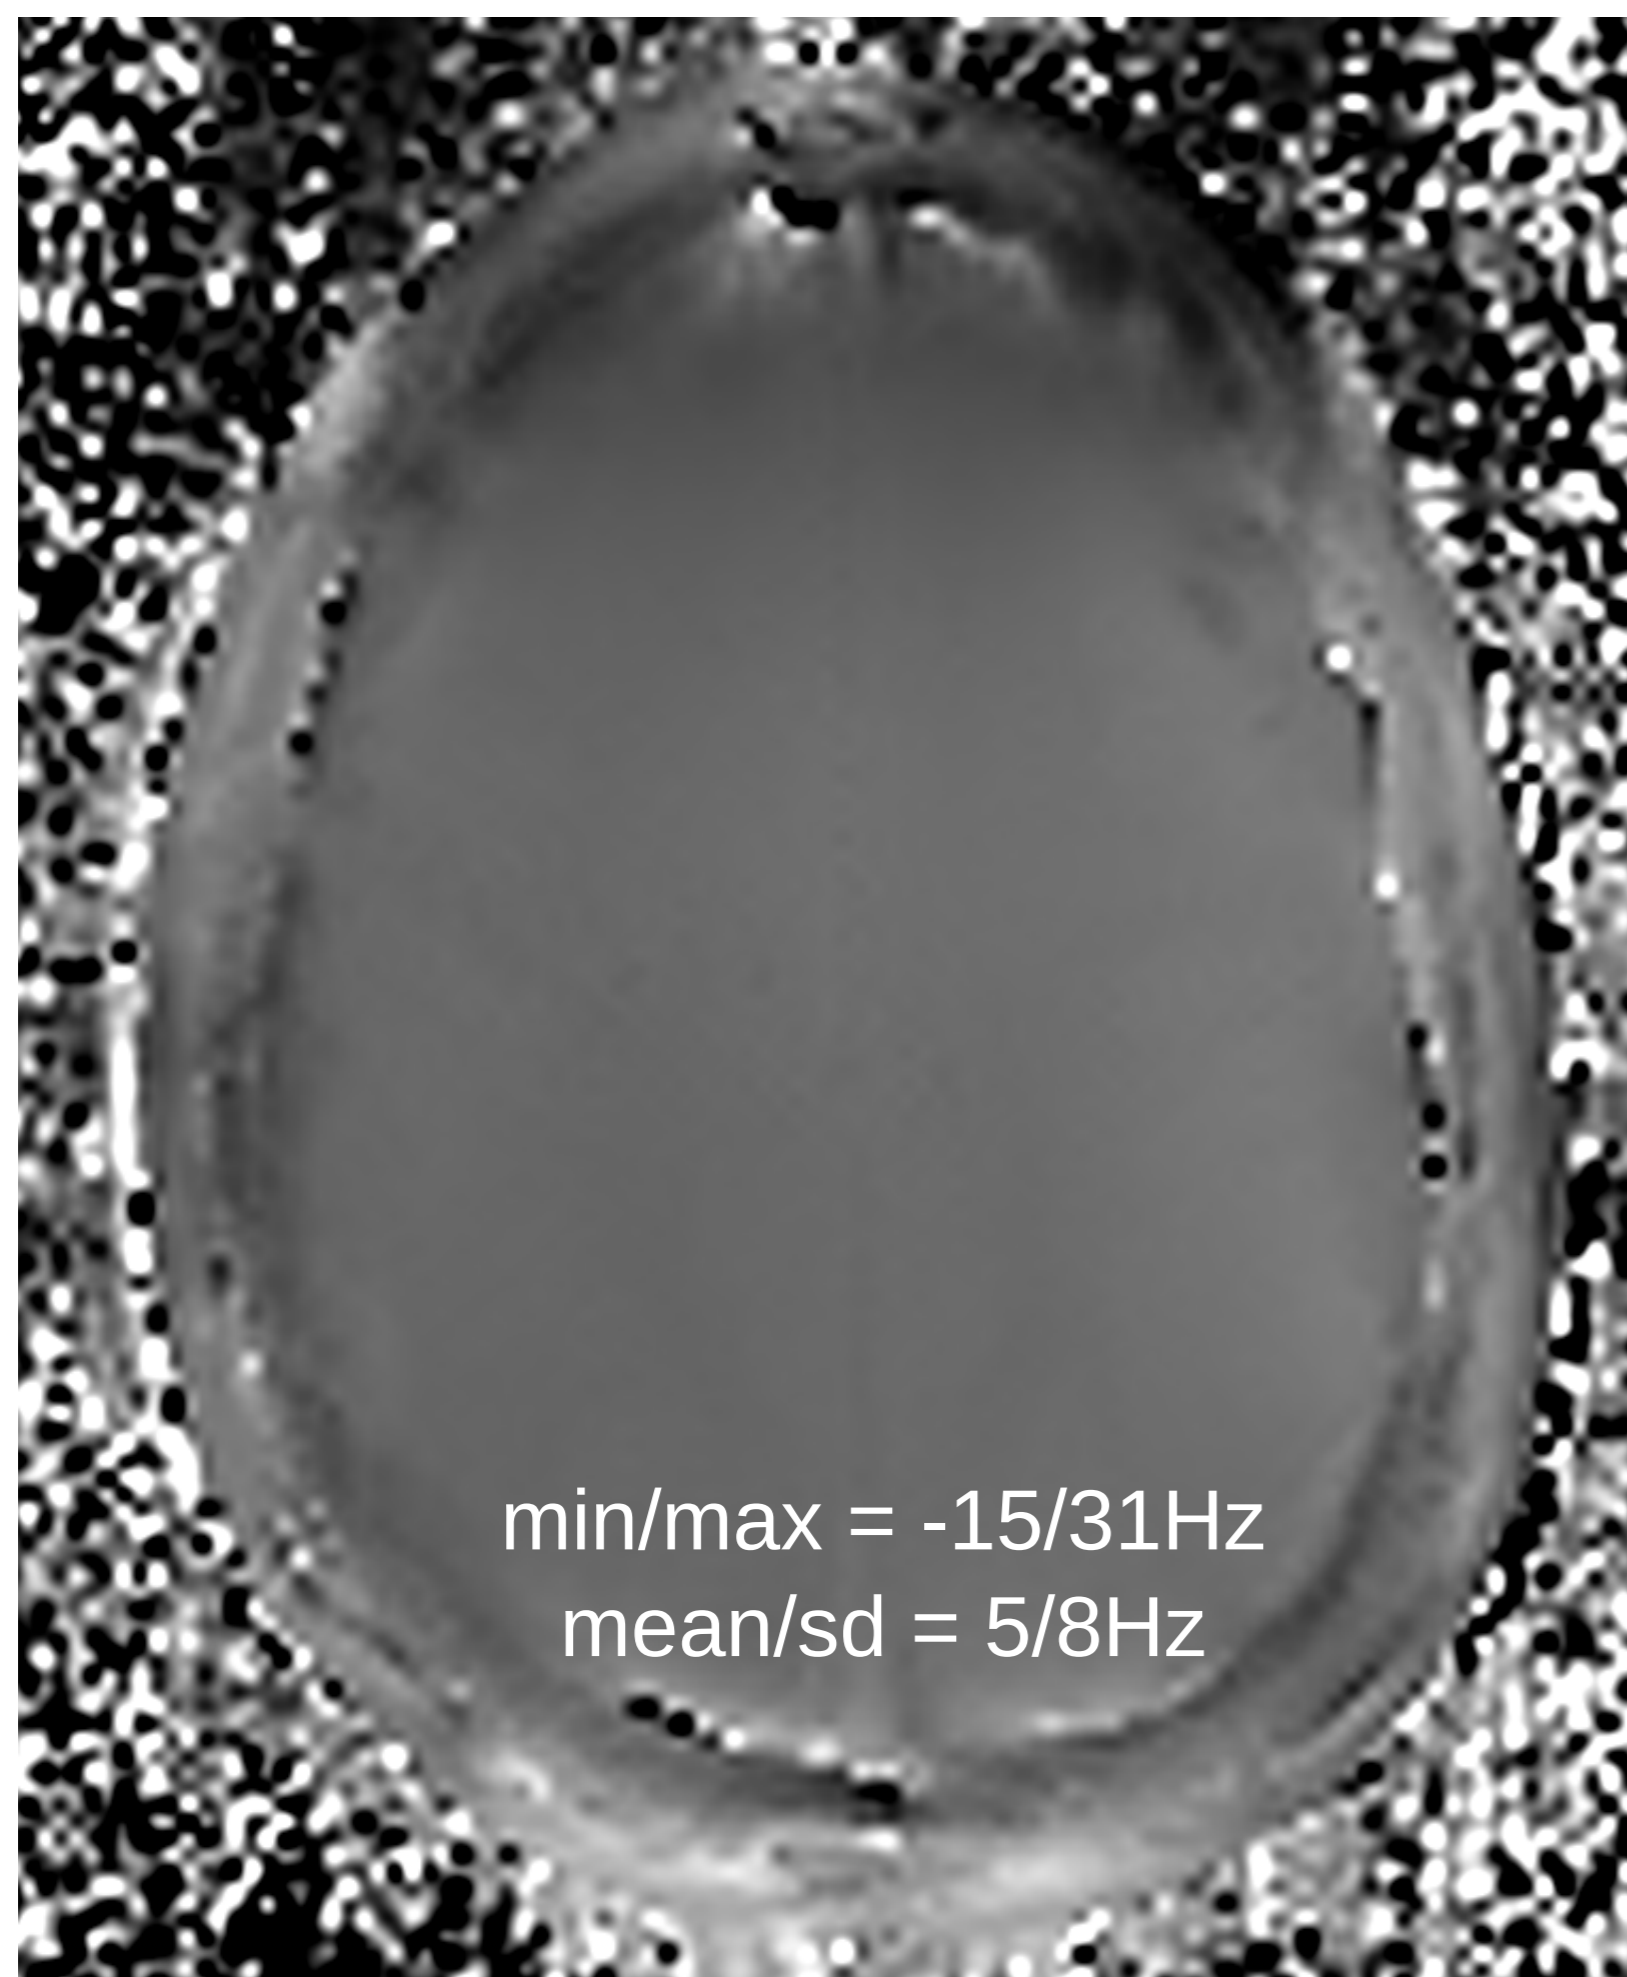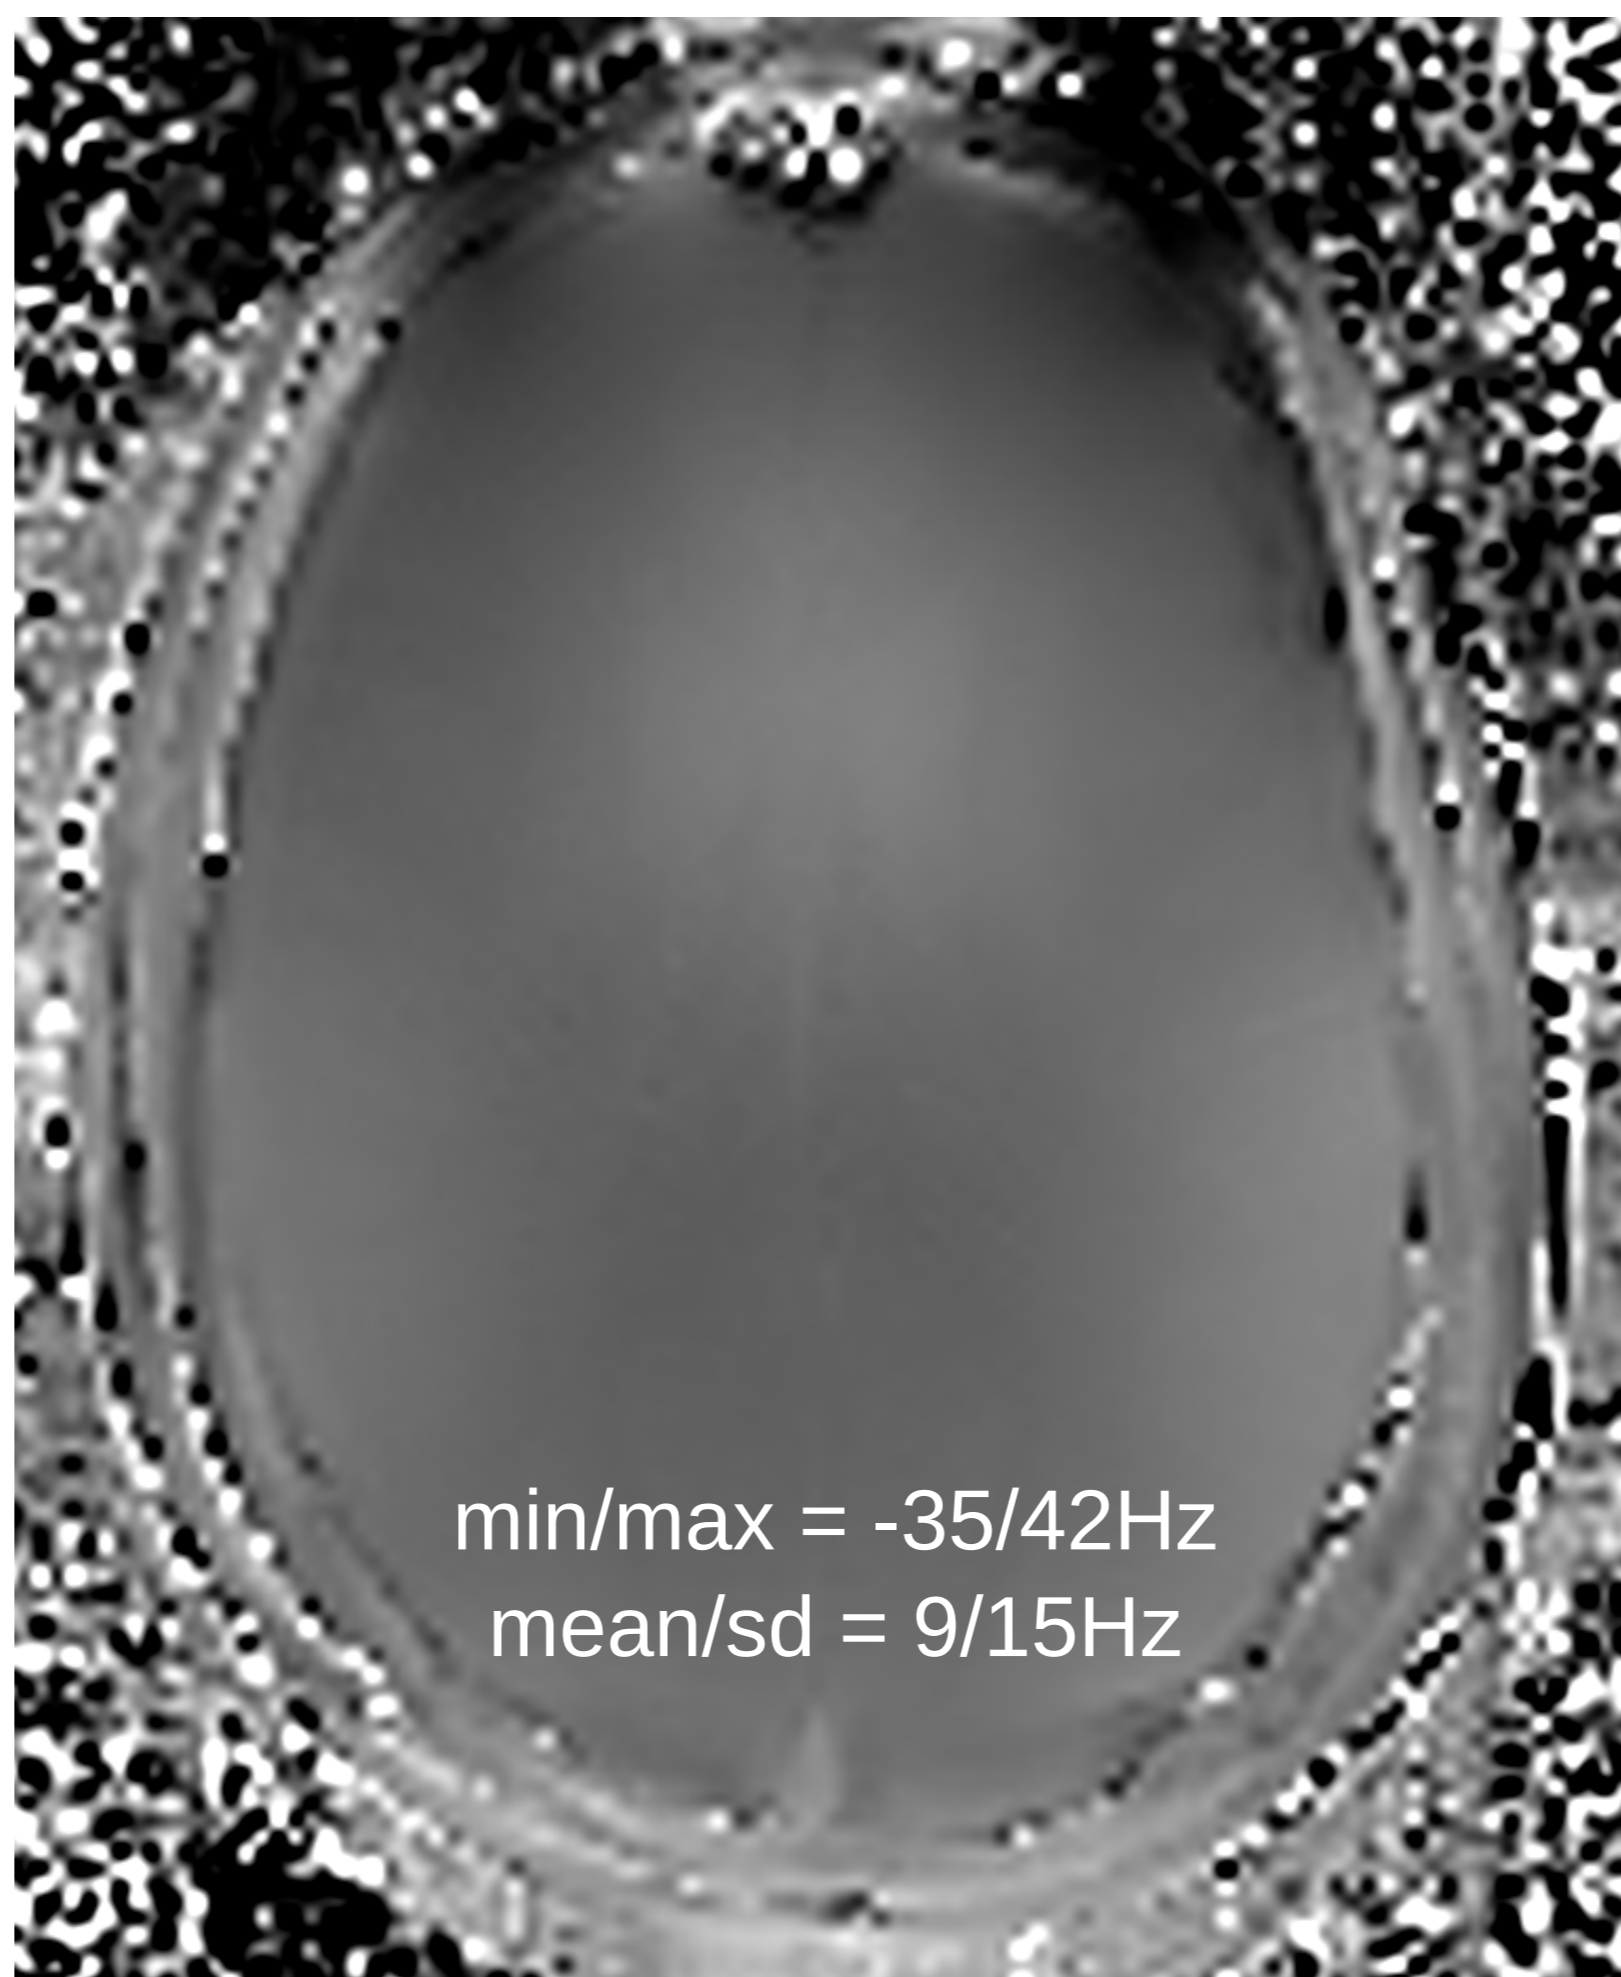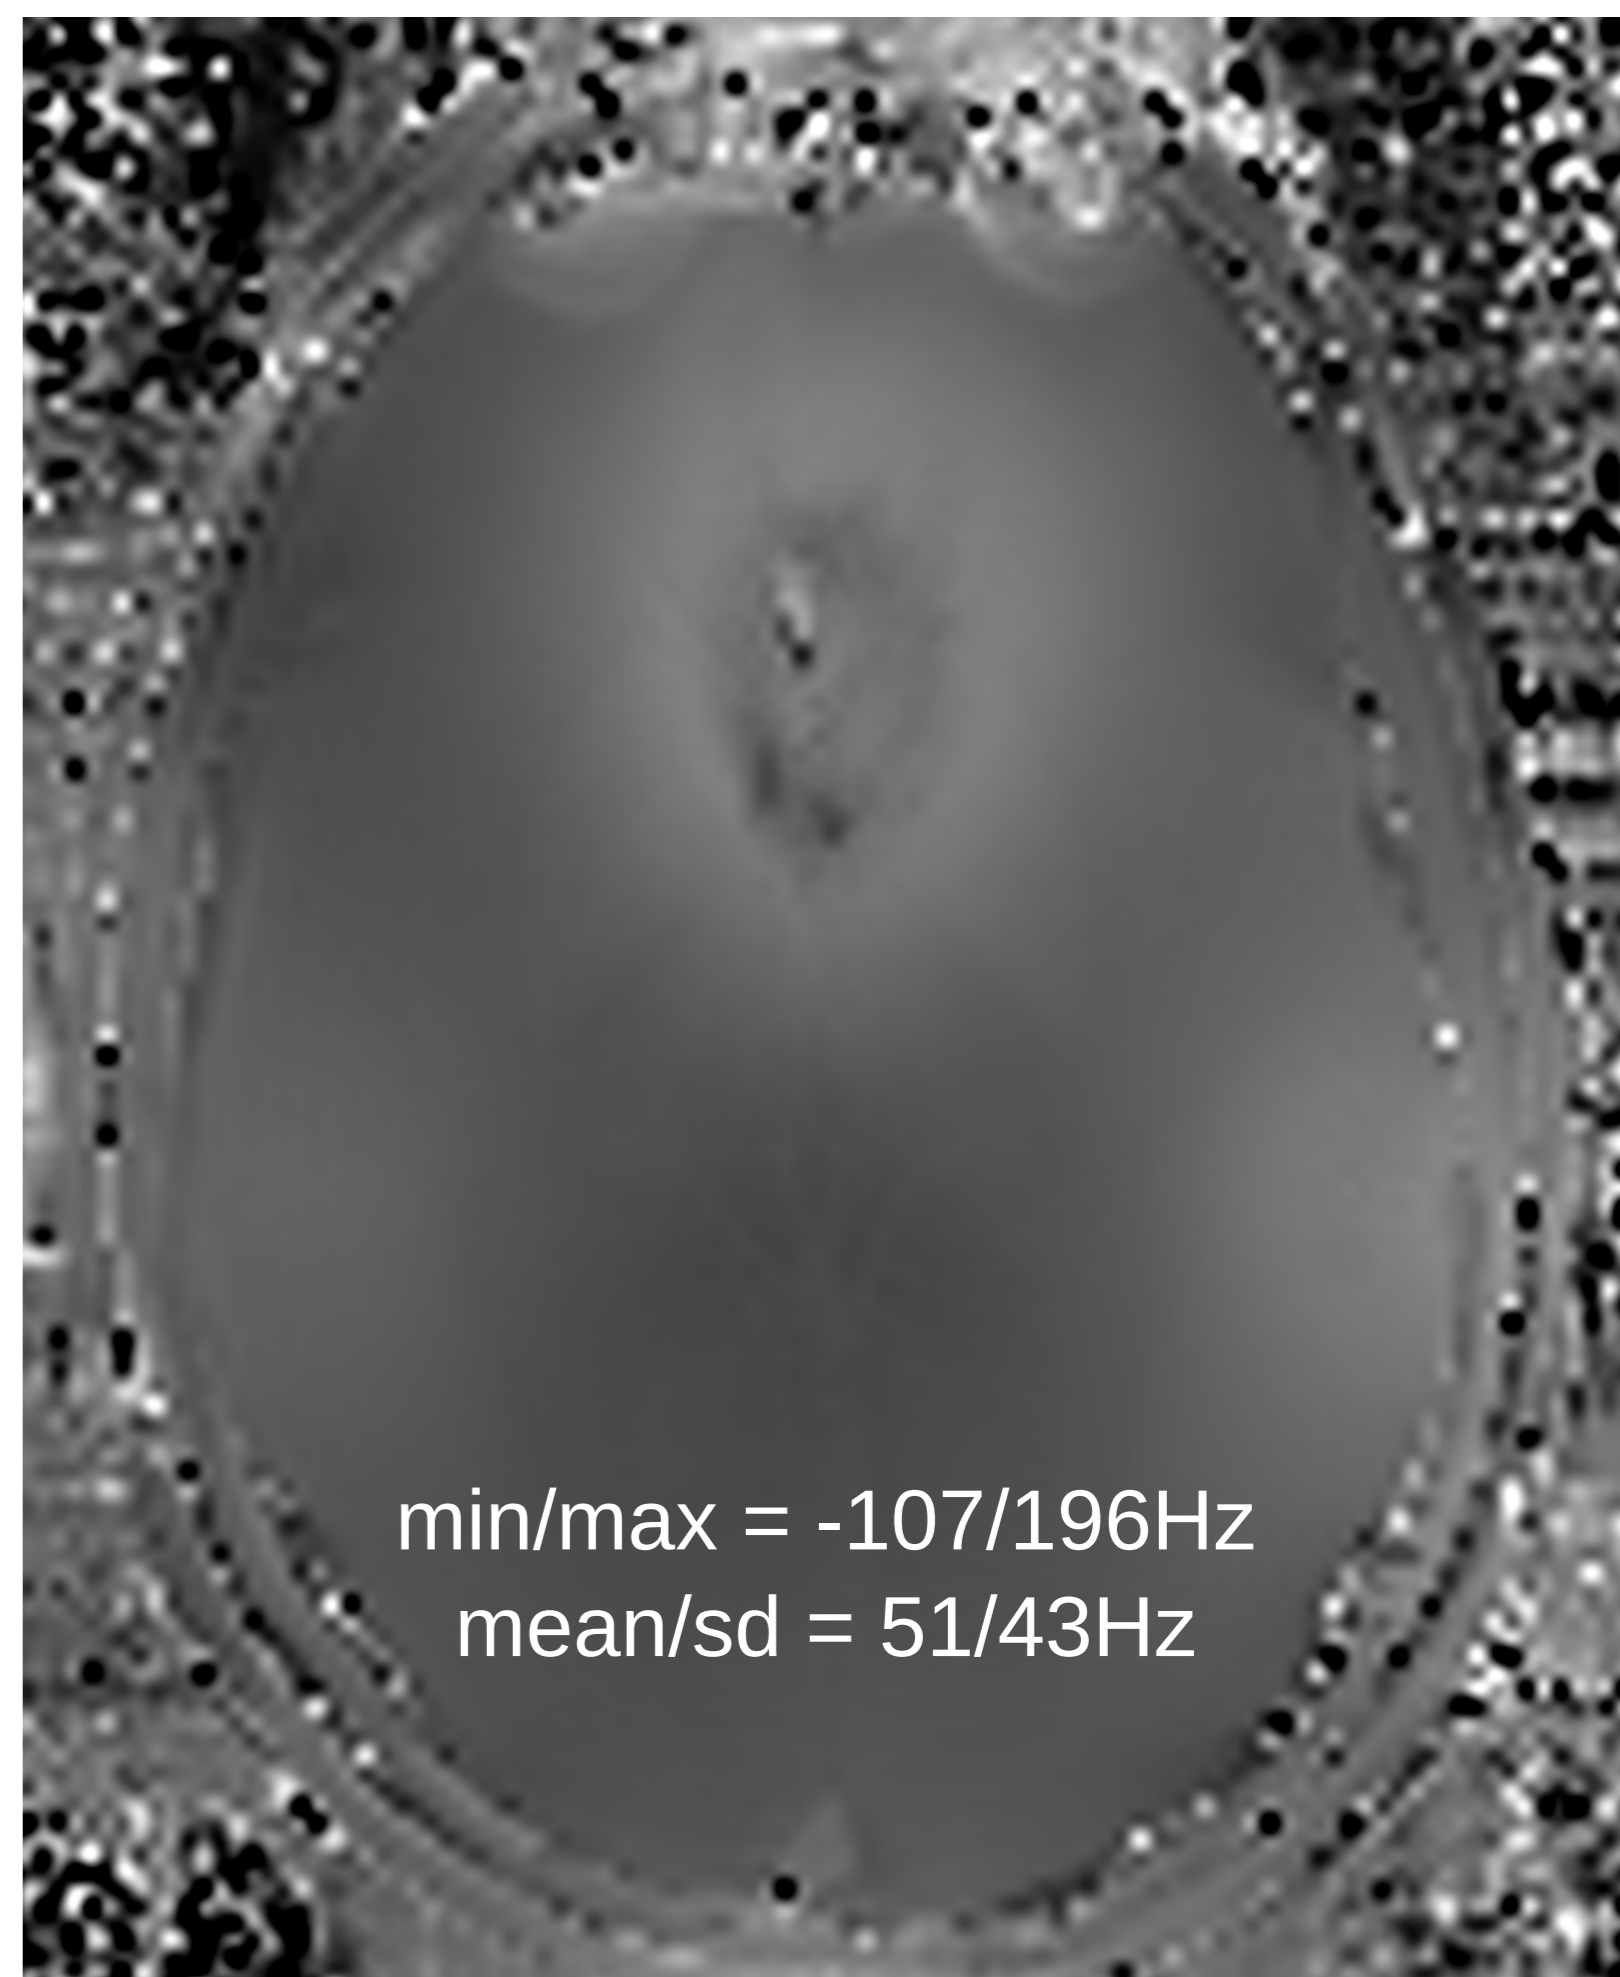

Supplement: EMS86380-supplement-Supplementary_Fig__1.pdf [file EMS86380-supplement-Supplementary_Fig__1.pdf]

# OFF

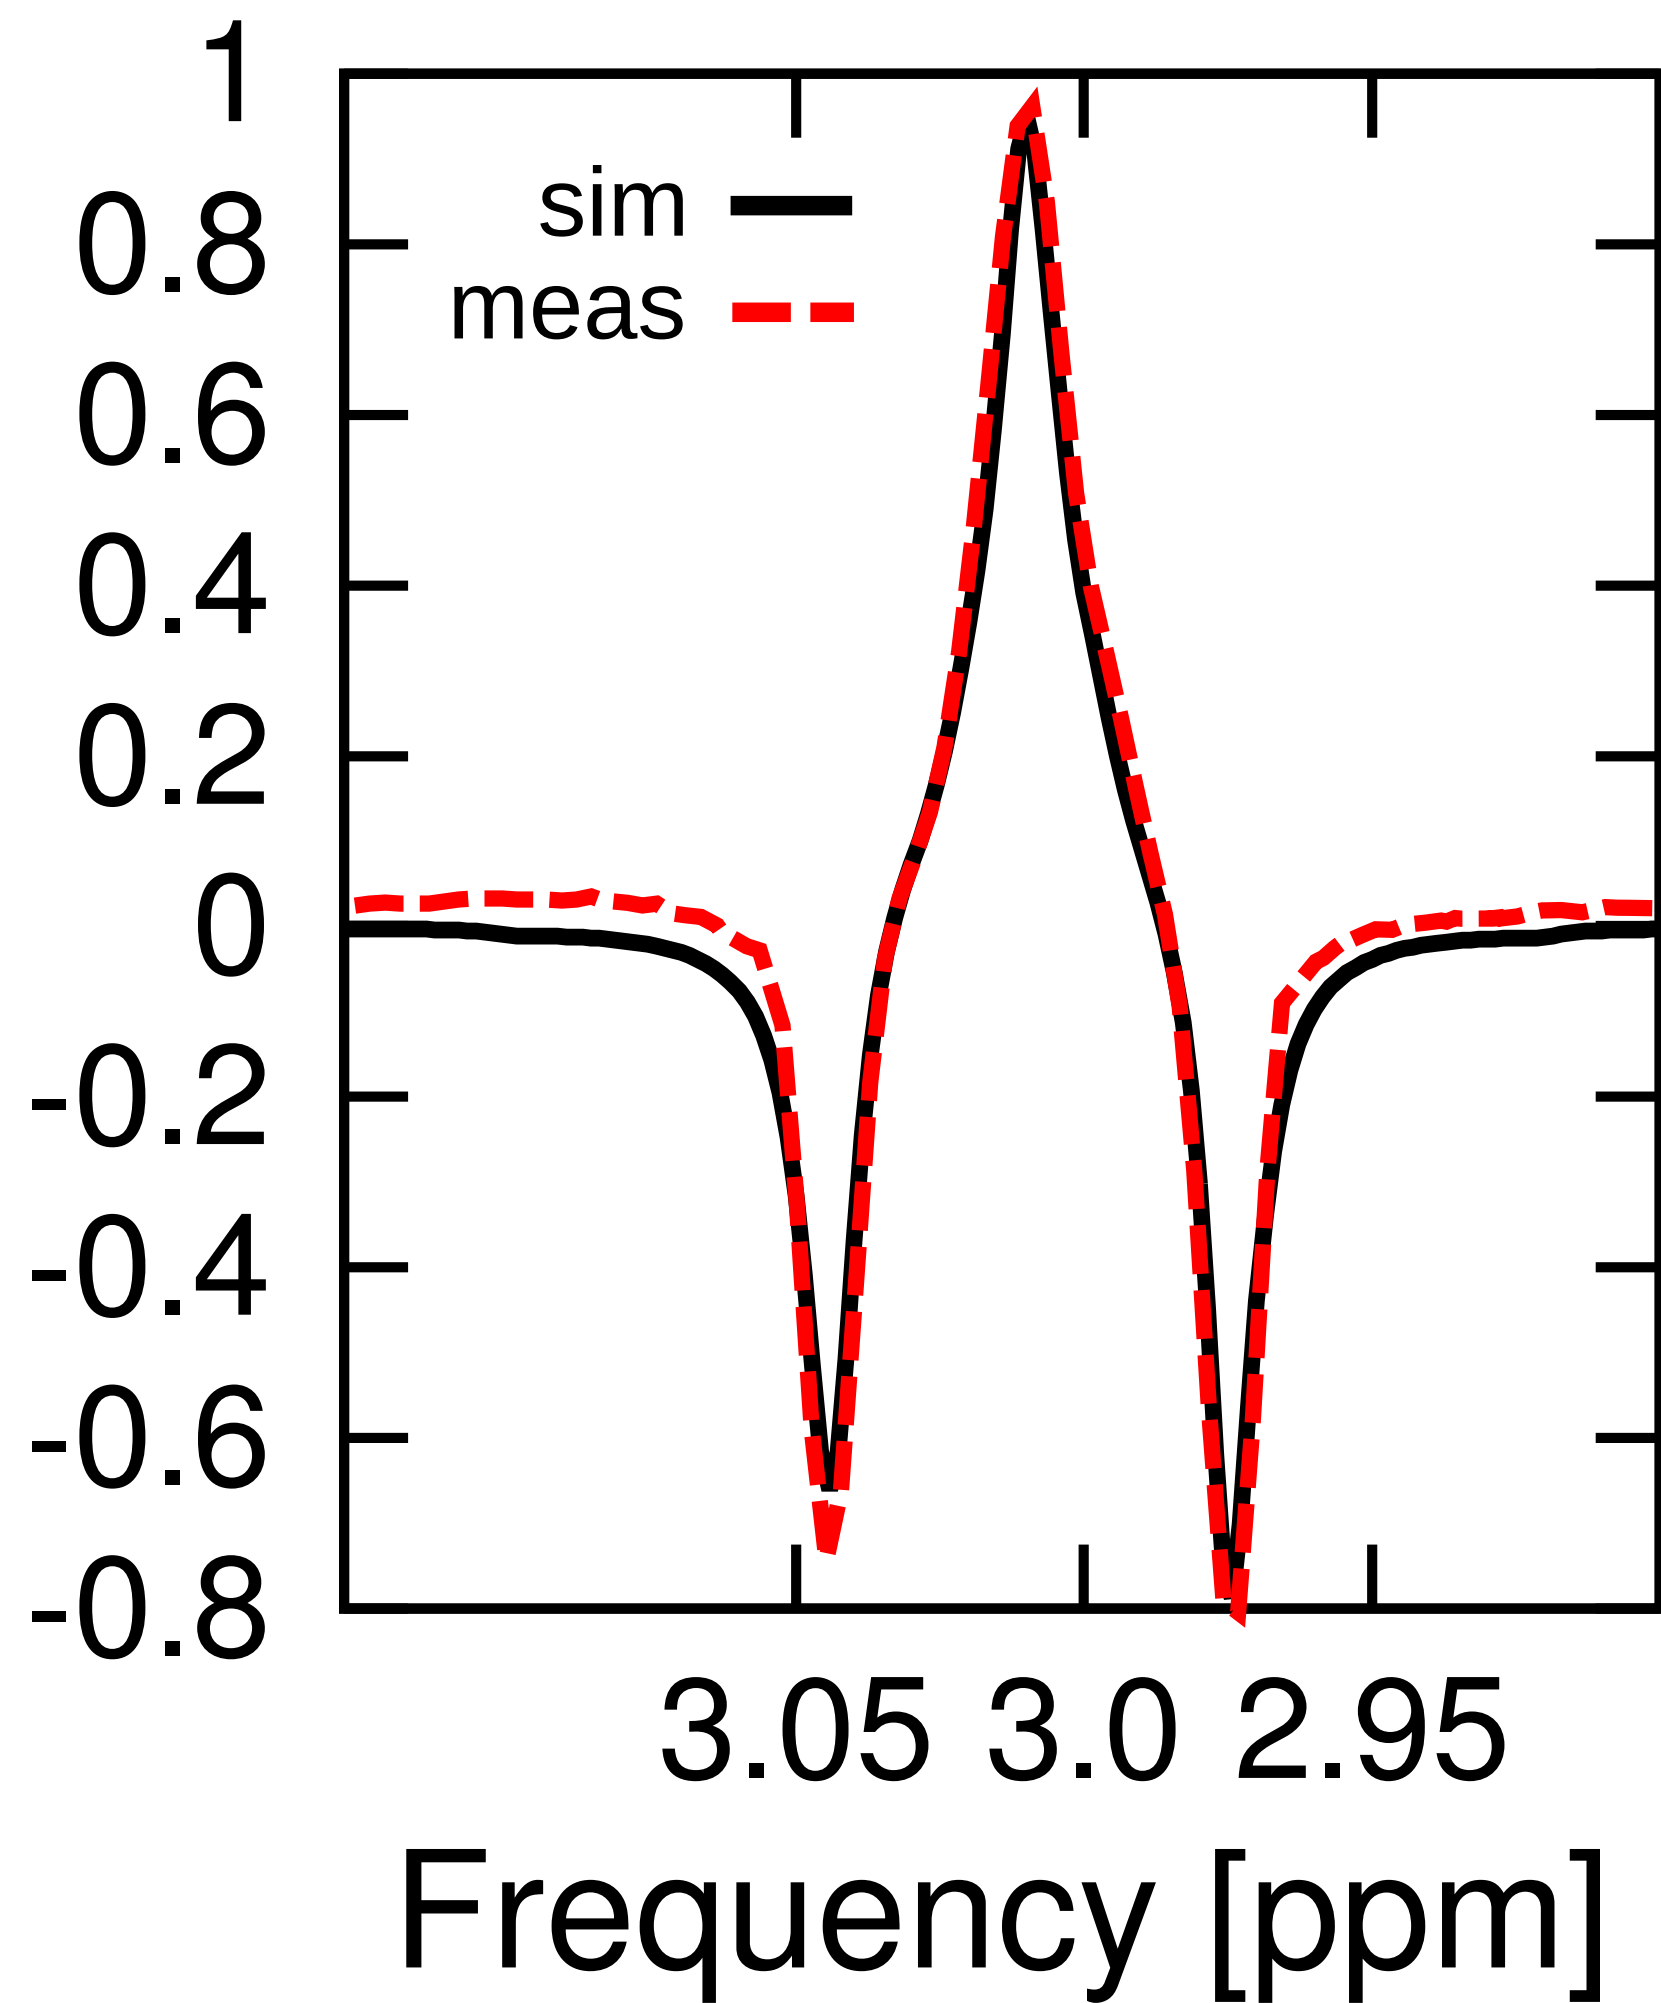

# ON

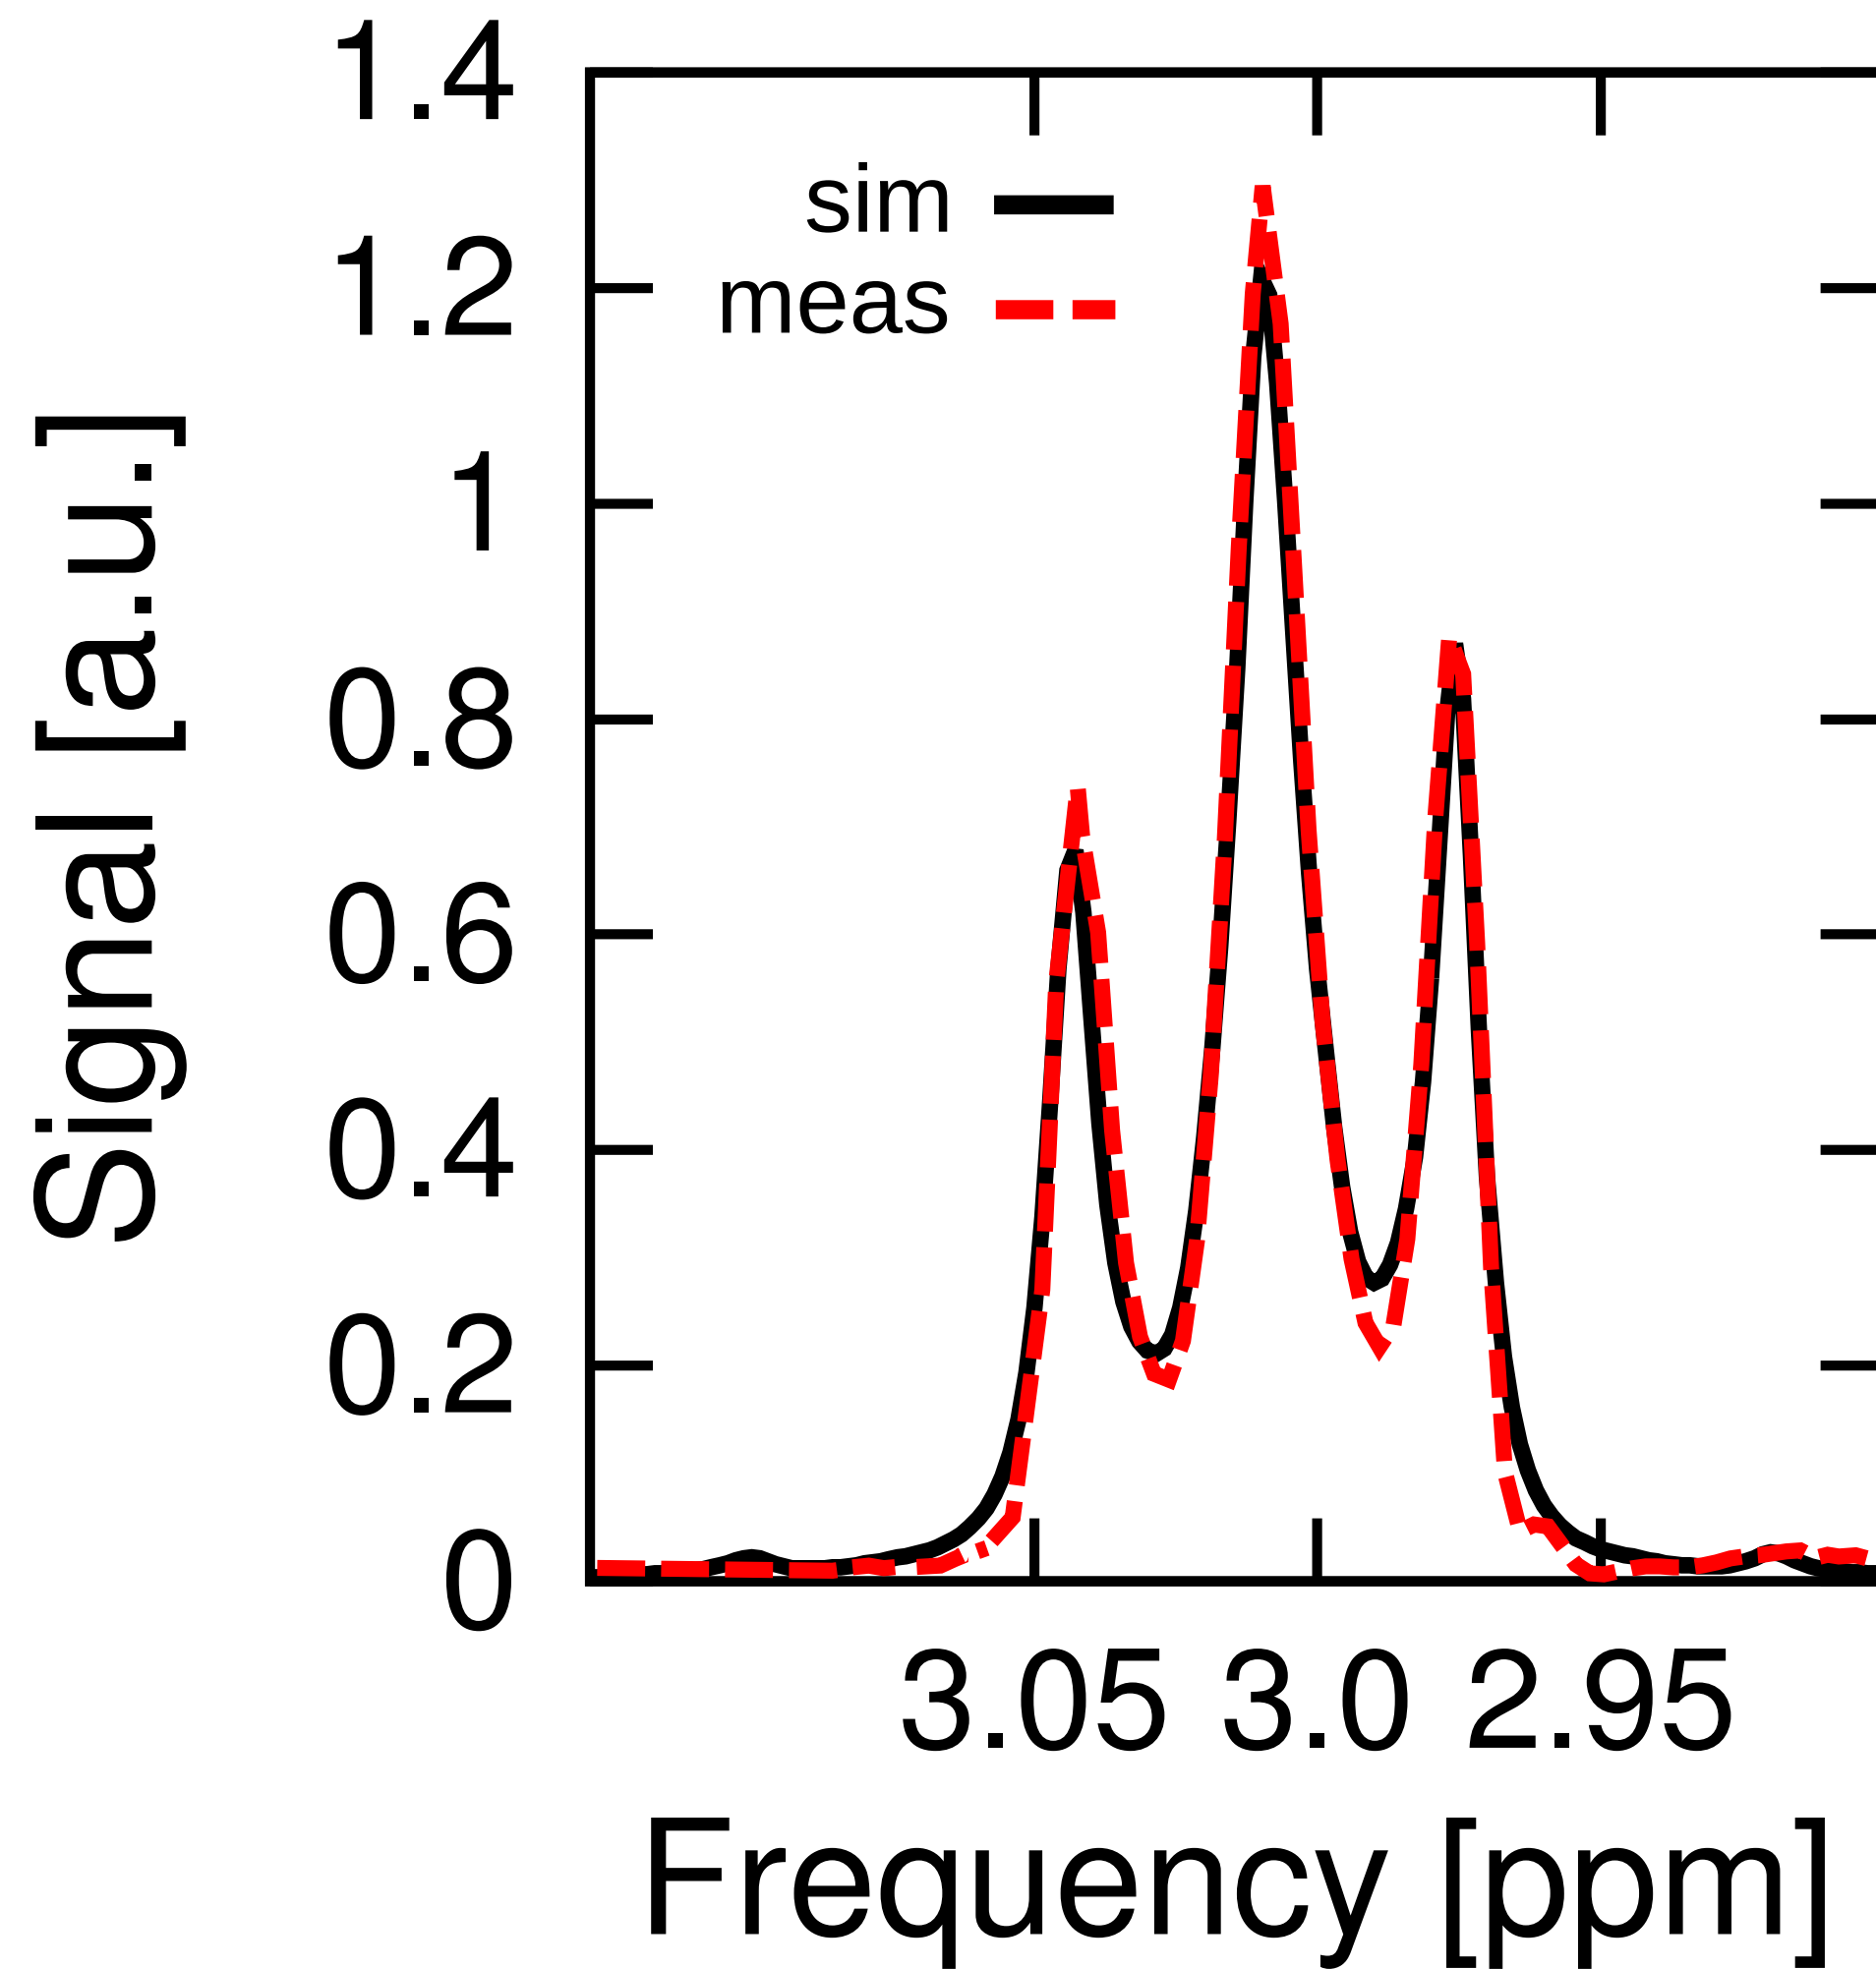

# DIFF

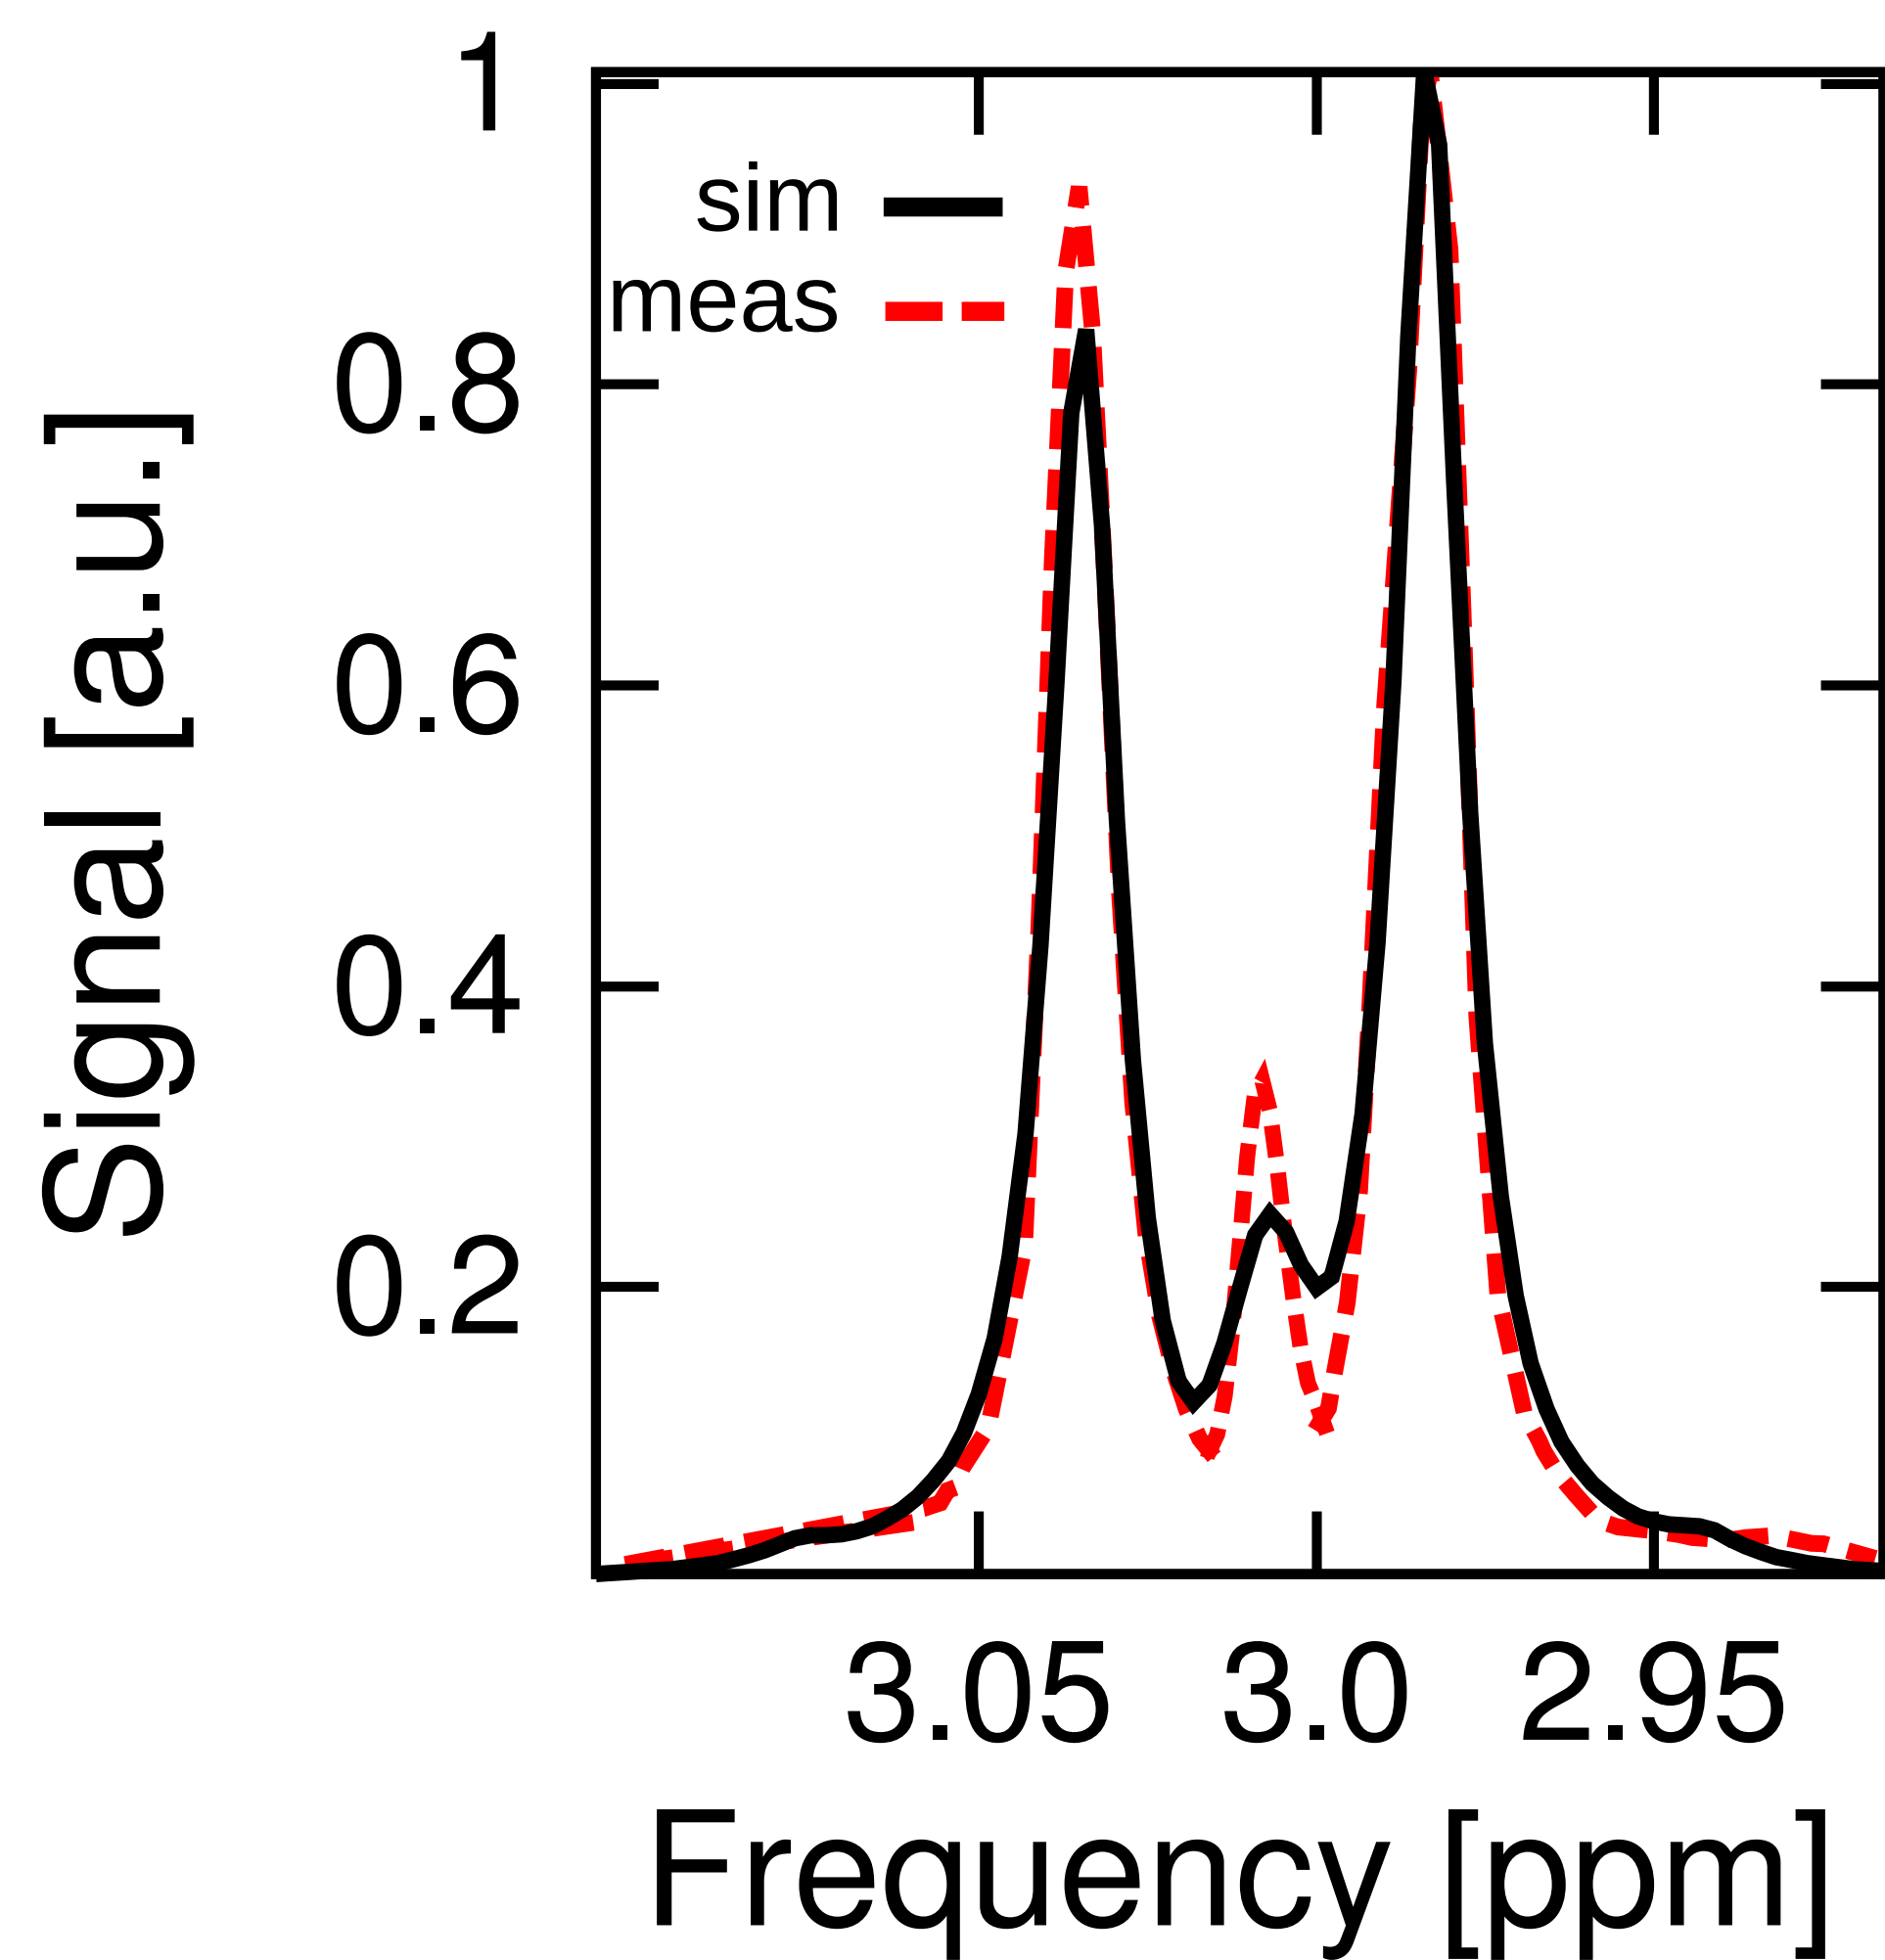

Supplement: EMS86380-supplement-Supplementary_Fig__2.pdf [file EMS86380-supplement-Supplementary_Fig__2.pdf]

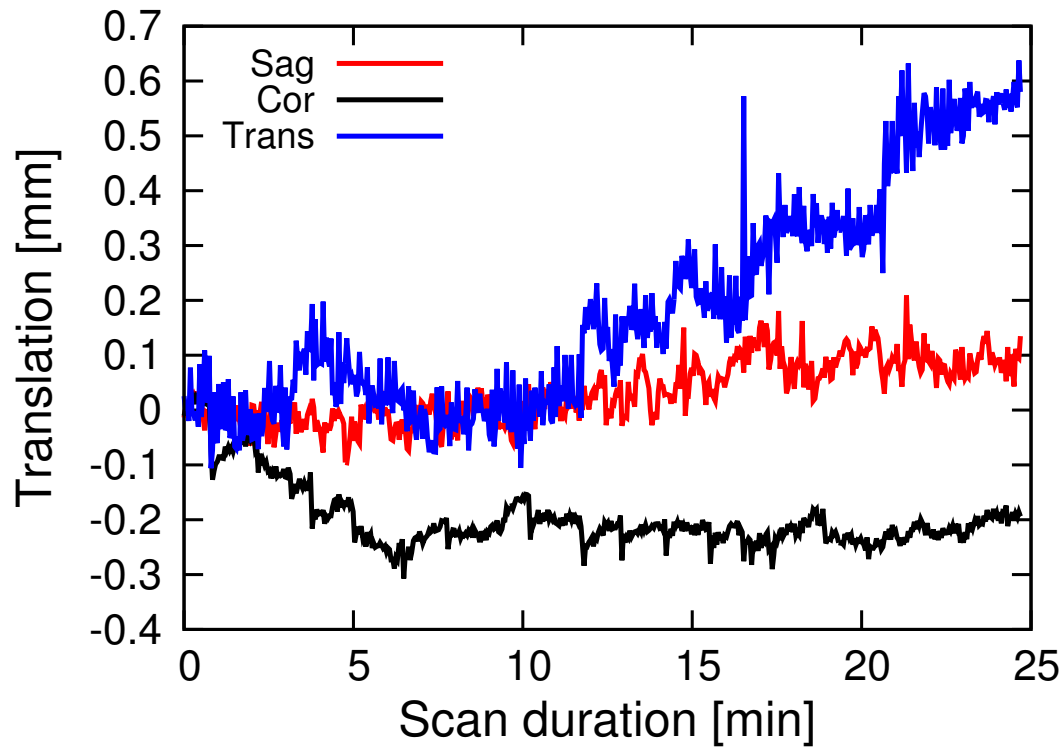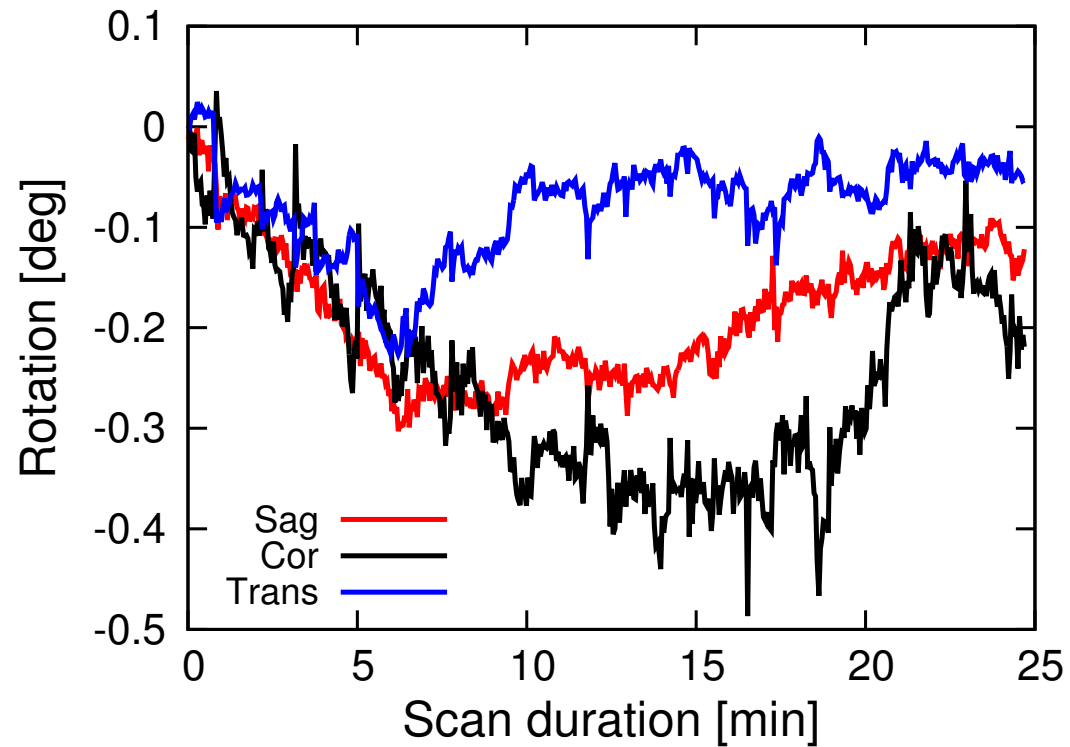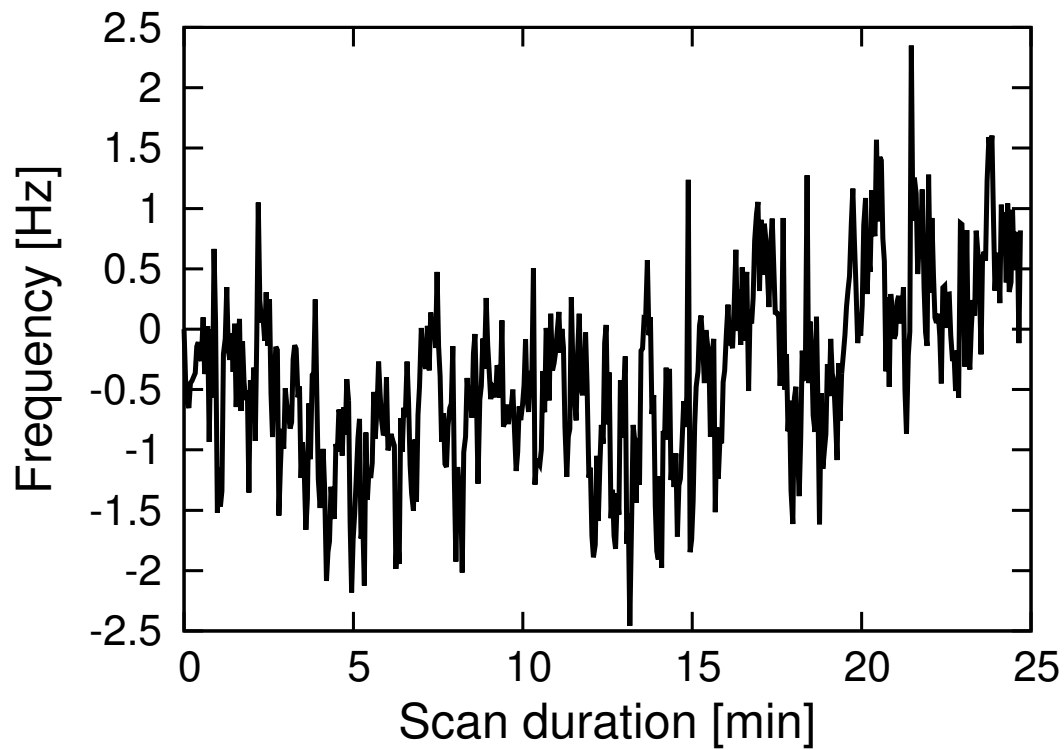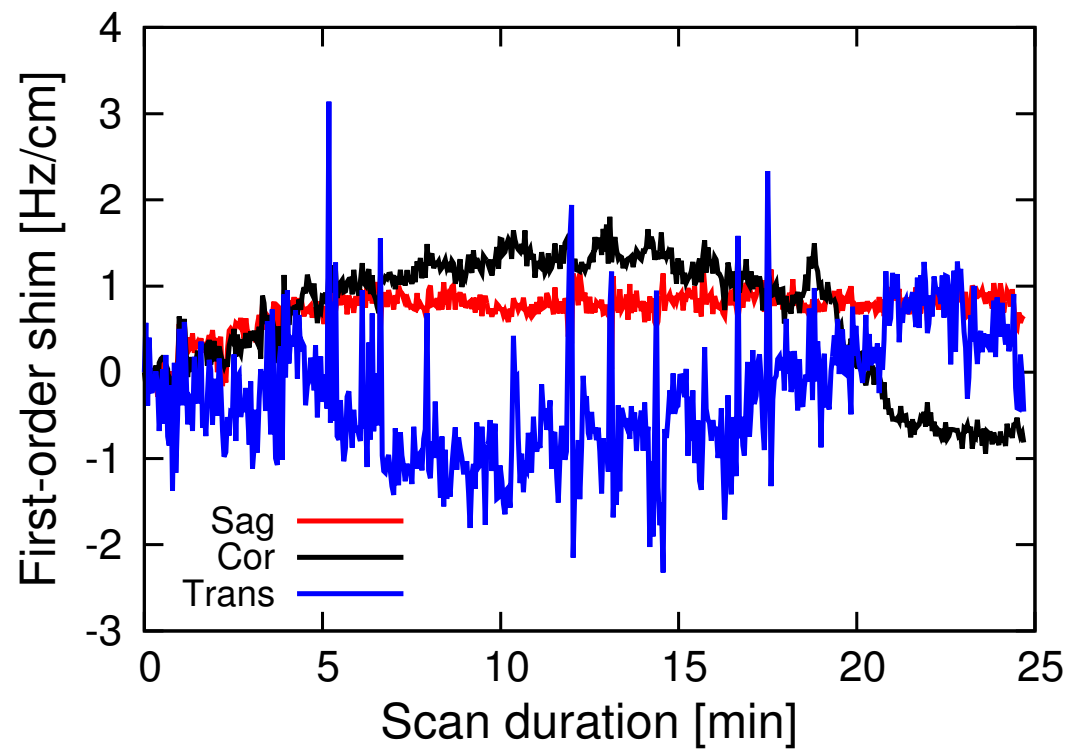

Supplement: EMS86380-supplement-Supplementary_Fig__3.pdf [file EMS86380-supplement-Supplementary_Fig__3.pdf]

IR ON

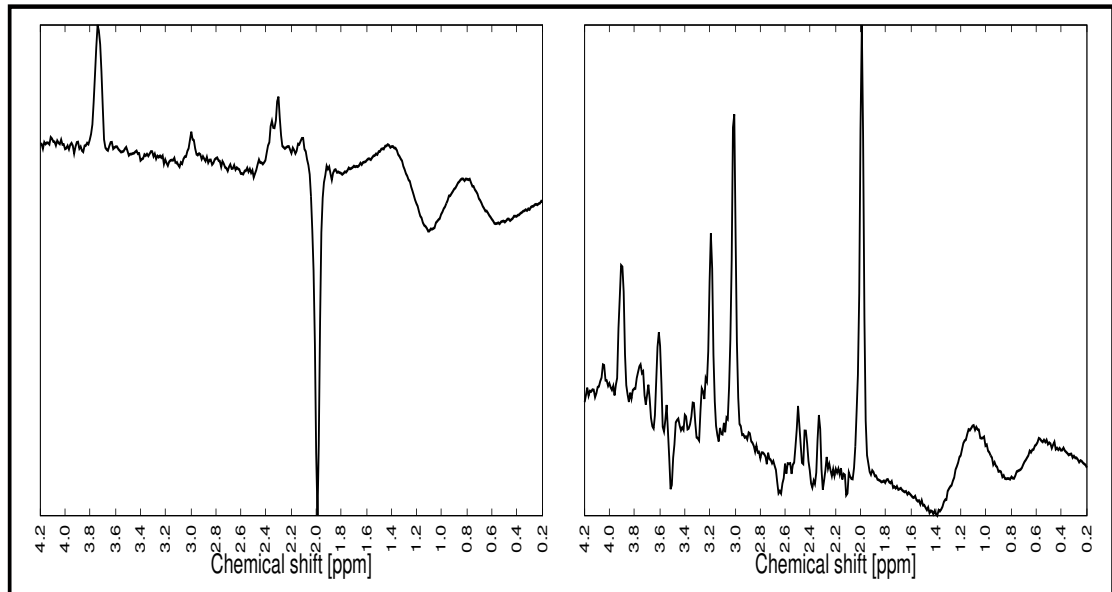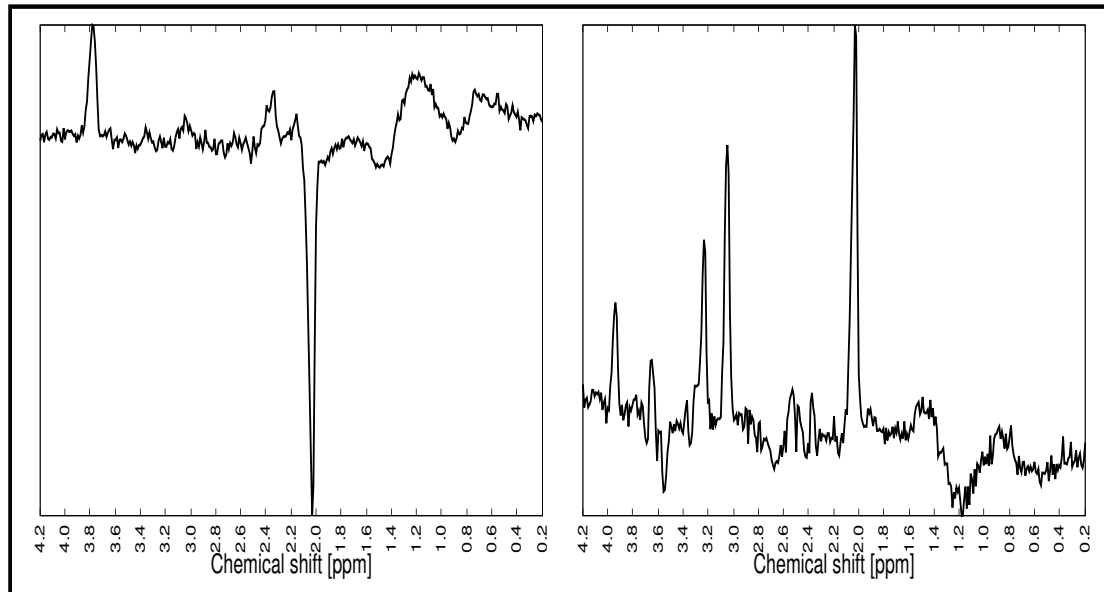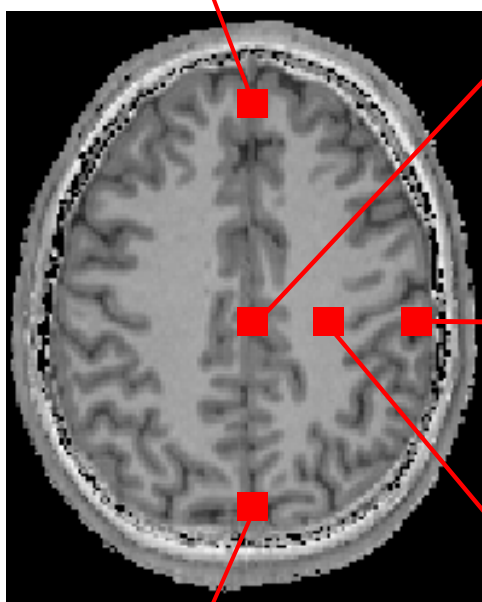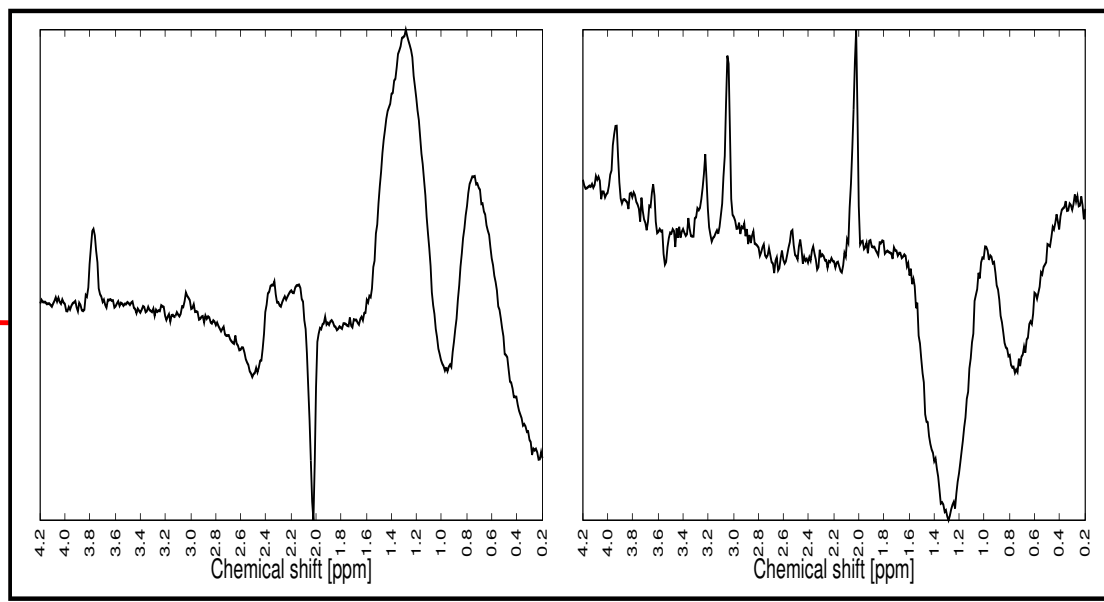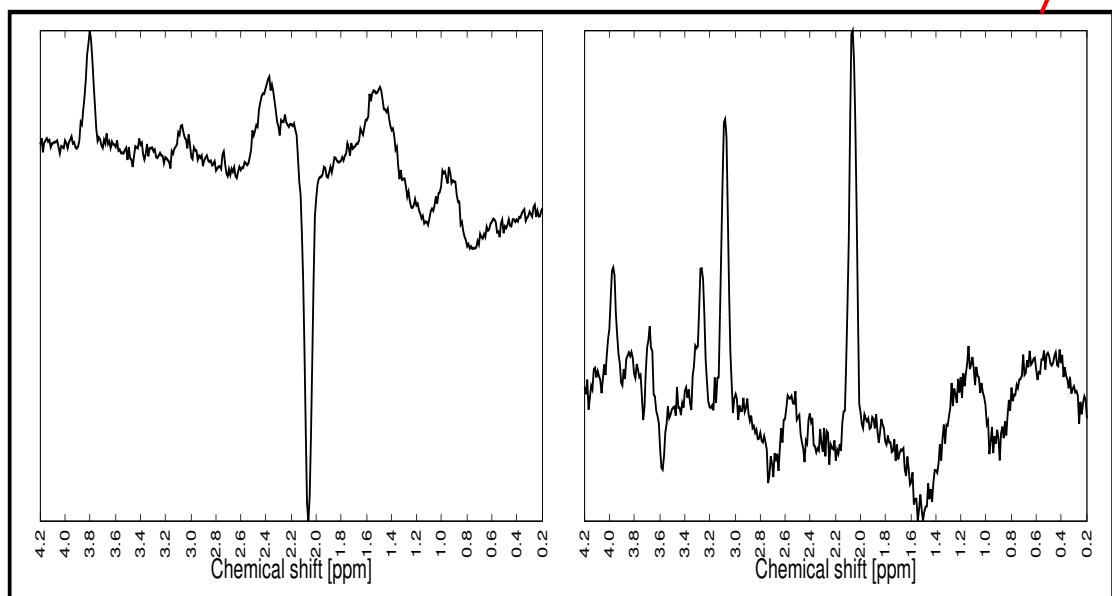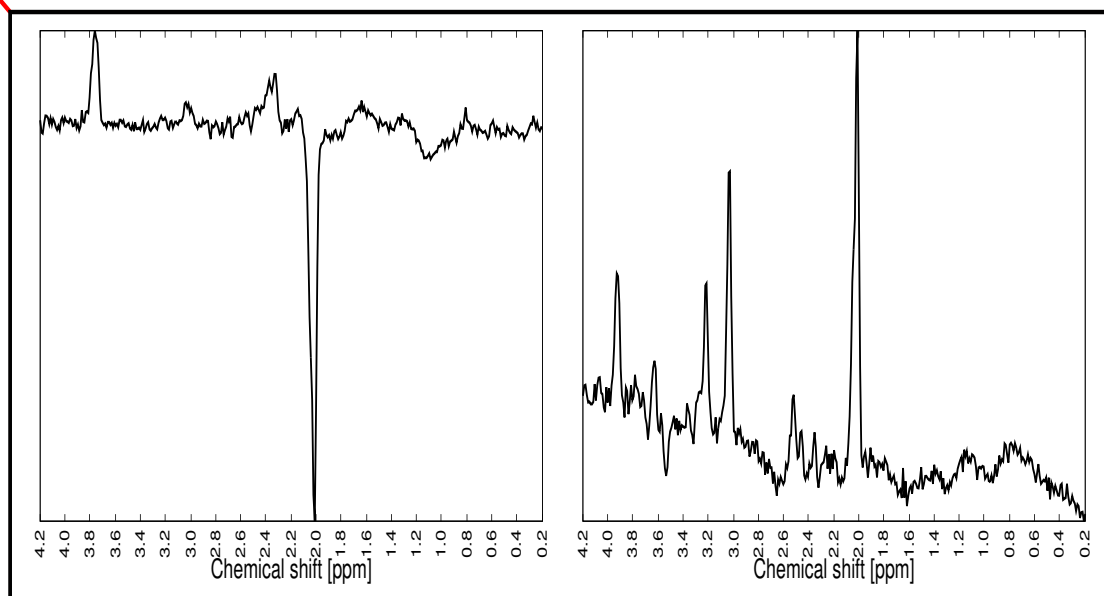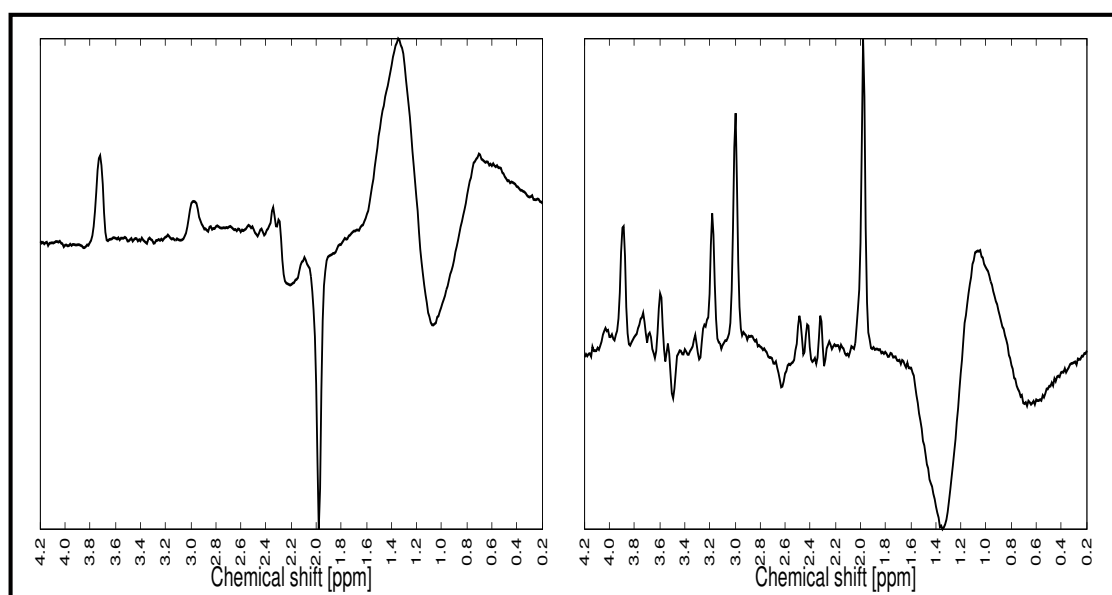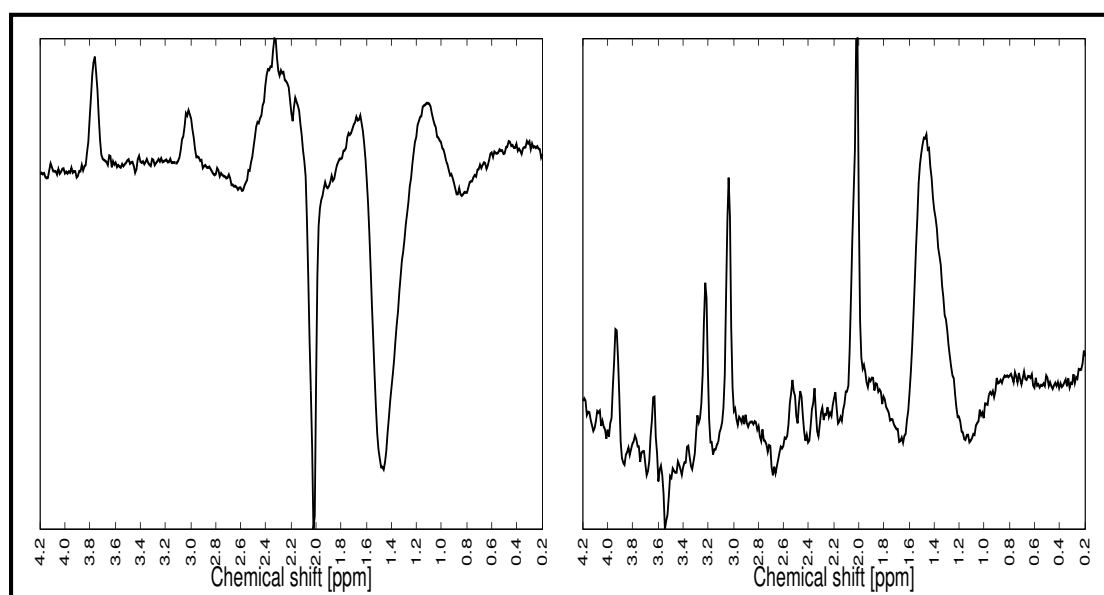

IR OFF

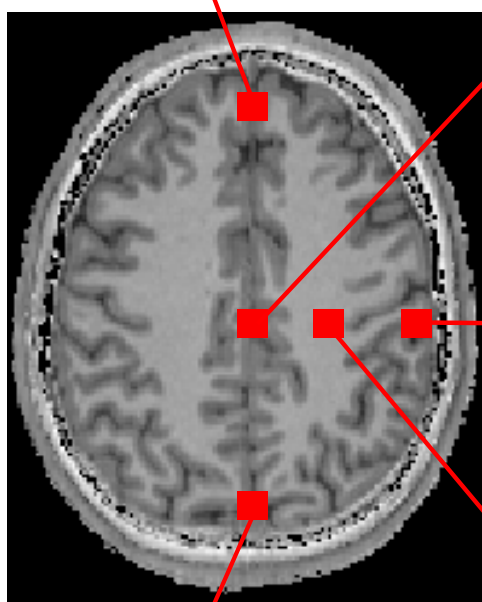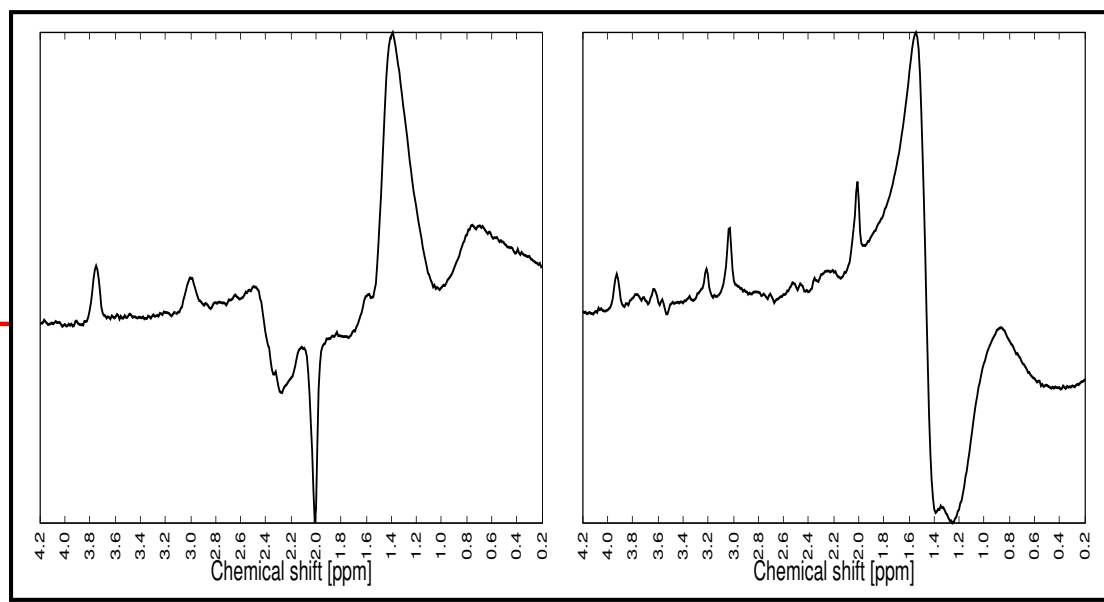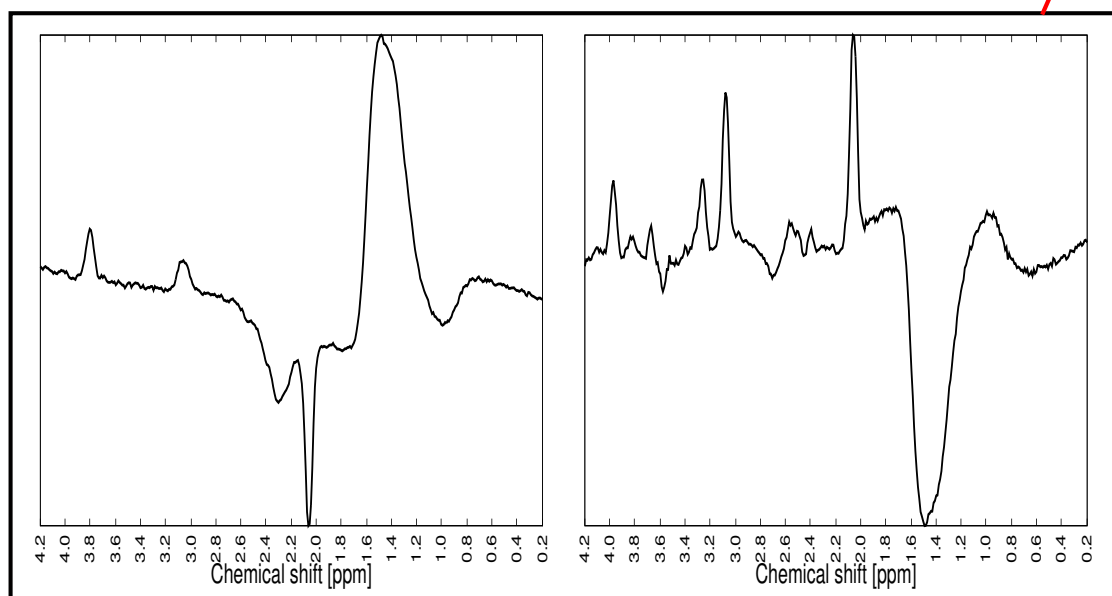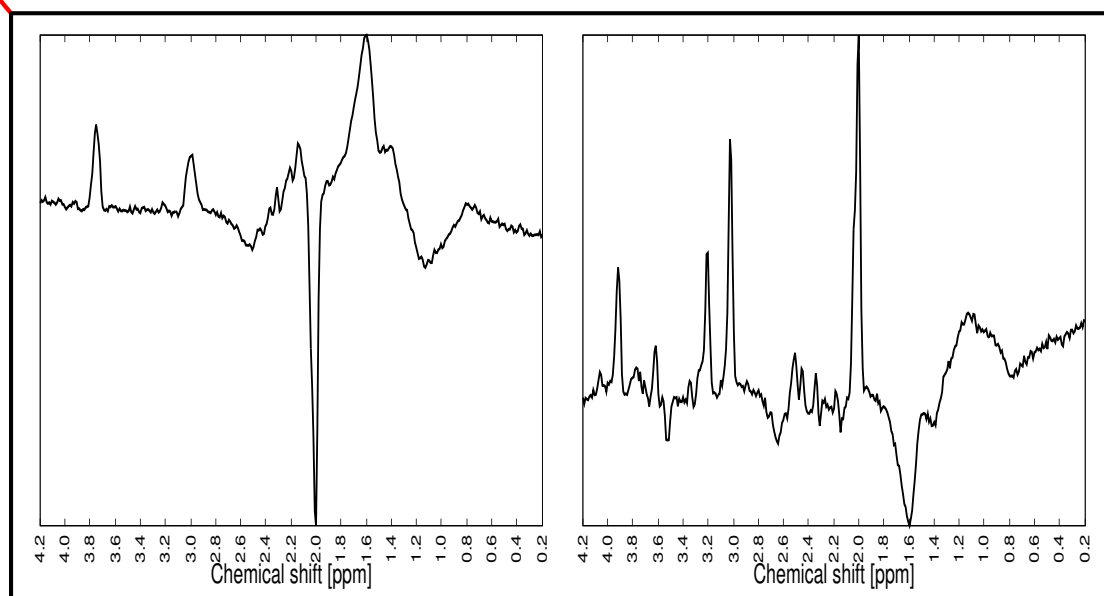

Supplement: EMS86380-supplement-Supplementary_Fig__4.pdf [file EMS86380-supplement-Supplementary_Fig__4.pdf]

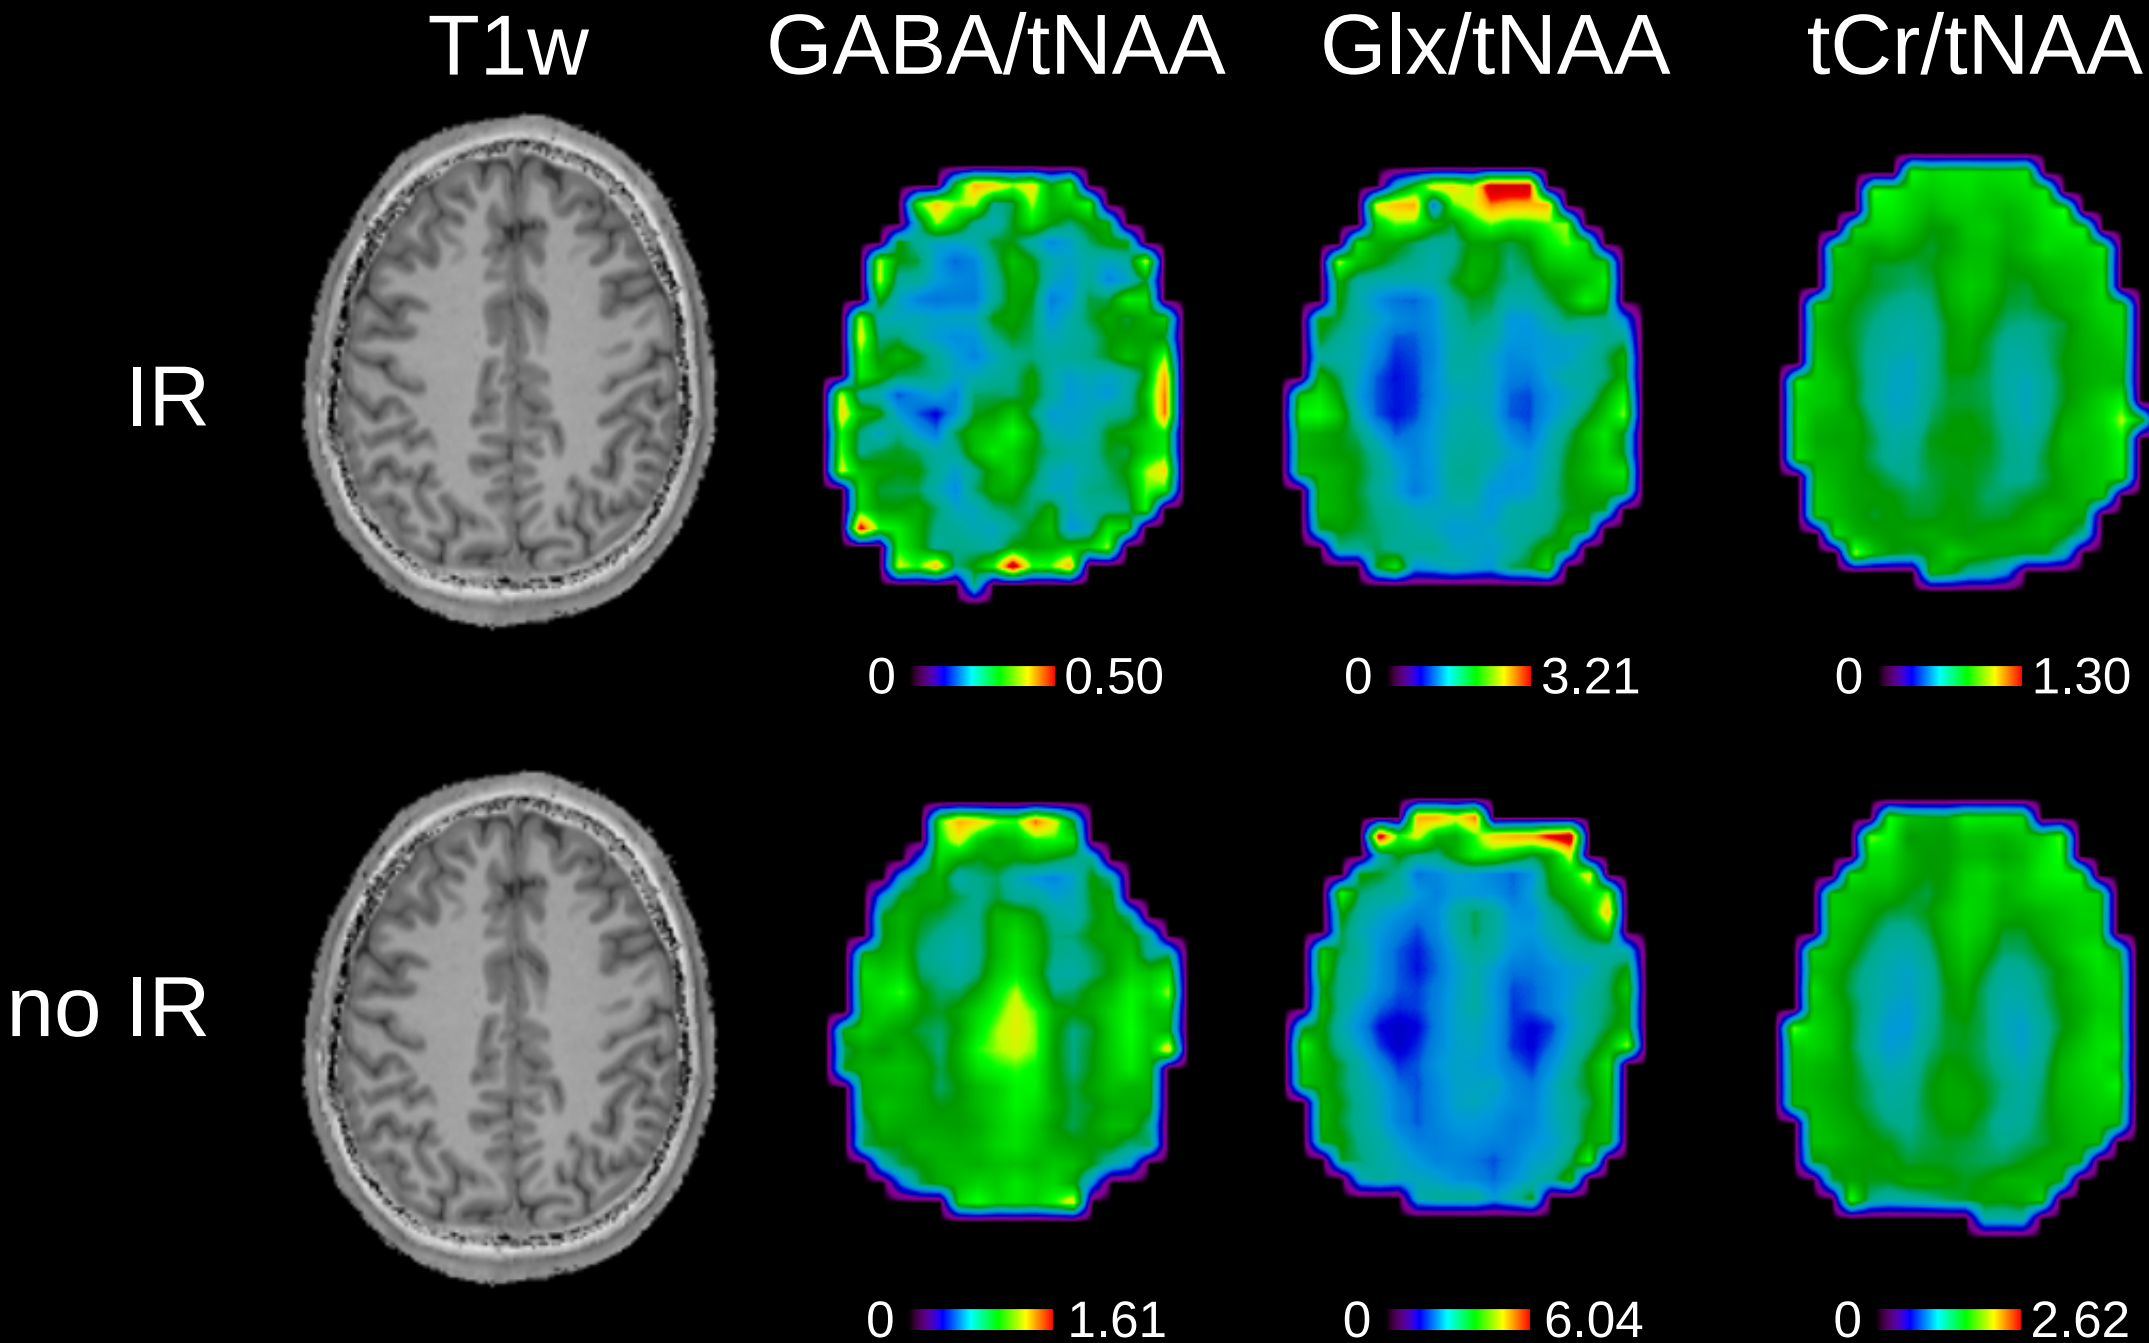

Supplement: EMS86380-supplement-Supplementary_Fig__5.pdf [file EMS86380-supplement-Supplementary_Fig__5.pdf]
